# Supplementary material for: Ship-borne aerosol profiling with lidar over the Atlantic Ocean:From pure marine conditions to complex dust-smoke mixtures
Source: Copernicus journal article supplement (doi:10.5194/acp-2018-54), 2018-02-28
Supplement: Supplementary file [file acp-2018-54-AC2-supplement.pdf]

## Letter of Reply to Referee 2

Thank you for carefully reading the manuscript and providing useful suggestions to improve the paper. The changes in the manuscript are marked in bold.

### Major points

• **The paper focusses on two research cruises, P95 and P98, but reference is also made to previous cruises in Table 1 and Figure 1. I suggest to remove this information as no data from these cruises is presented. In turn, it raises the question why not all cruises with the new setup of PollyXT (PollyXT-OCEANET?) have been presented here. In this context, I am also missing proper reference to the previous cruises presented by Kanitz (2011, 2013, 2014) or in fact the wider literature in the discussion of the data. Please refer to the peer-reviewed papers rather than the PhD thesis of Kanitz (2012).**

Thank you for this comment. The not presented cruise tracks and references to those cruises were removed. References to peer-reviewed papers of Kanitz were added in addition to provide the information in the revised manuscript.

• **The structure of the paper should be revised. Section 2.2 (overview) should mark the beginning of the results section. After that, Section 3 could be split in case studies (3.1) and statistical analysis (3.2). The description of the data analysis (p6, l4-11) should be moved to Section 2 (instruments and methods) together with some more details on the data analysis and error calculation (same as in Baars et al. (2016) or Engelmann et al. (2016)?) as well as the procedure for selecting the data for the statistical analysis (i.e., what are the requirements for a measurement to be suitable for full analysis in Figs. 14-16?). Also, why is GDAS1 being used in the analysis when there are soundings from Polarstern available?**

Thanks for this suggestion. We have restructured the manuscript accordingly. The overview section has been moved to the results and Section 4 is included in Section 3 as 3.3.

Section 2 is now called Instrument and methods and includes information about the Instrument and the data analysis. Some more details about the data analysis are given and references to Baars et al. (2016) and Engelmann et al. (2016) are added. Procedures are well explained in these articles and we prefer not to repeat those here. p6, l4-11 describes the smoothing of the signals this paragraph was shortened and moved to the Instrument and methods section.

All suitable Raman measurements i.e. appropriate weather conditions and instrument status were selected for the statistical analysis. A comment on the selection of the measurements was added and moved to the beginning of the statistical analysis section.

GDAS1 data is used because the soundings aboard Polarstern were only conducted once a day around noontime. Because the ship is constantly moving, those soundings may not be representative for the atmospheric conditions during the night (up to 12h later). Thus we prefer to stick with the modelled profiles. A clarifying statement was added in the Instruments and methods section.

• **The description and discussion in Sections 4.1 and 4.2 should be combined and shortened. Maybe the mean values for the different layers and wavelengths can be presented in a table? Also, please consider the use of histograms to present the data set (if there's enough data points). The reference to previous relevant publications on the observations of different aerosol types and aerosol classification schemes needs to be improved.**

Section 4.1 (now 3.3.1) has been rewritten and shortened. We decided not to combine sections 4.1 and 4.2 to keep a clear separation between the description of latitudinal differences and the aerosol classification

in Section 4.2 (now 3.3.2). We also considered the presentation of the data in histograms, but to show latitudinal differences the amount of data points is not sufficient.

• **The authors state throughout the paper that parameters are significantly different. Have any significance tests been conducted to warrant these statements? Please be accurate in your wording. The same holds for the use of "good agreement".**

Thank you for this comment. I agree that I have to be more accurate in my wording as a non-native English speaker. The section with most of those expressions was rewritten and contains less vague statements in the revised manuscript.

• **The enhanced depolarisation ratio of dried marine aerosol is an important finding of this paper that should be better highlighted. Maybe discuss the implications for aerosol mistyping in satellite lidar retrievals more thoroughly? You recommend to use information on relative humidity for aerosol classification over the ocean. Why has this idea not been explored further in this paper?**

We shortly discuss the impact on misclassifications of depolarising layers on top of the marine boundary layer in the end of the paper. An intense discussion of a new aerosol classification using relative humidity would set a complete new focus. Nevertheless this is an interesting topic and has to be explored, we therefore state in the outlook that this could be a topic for future studies.

## Minor points

• **p2, l8-13: What about satellite observations?**

Satellite observations are one possibility to measure aerosol distributions also over ocean. The sentence is now changed.

• **p3, l1-4: Pretty much the same has been stated in the previous sentences.**

We agree. The sentence is changed in the manuscript.

• **p3, l32: Please note that the exponent and the particle linear depolarisation ratio are qualitative measures that provide relative information, i.e. an increase in the particle linear depolarisation ratio refers to particles being "more non-spherical" than before rather than an increase in non-spherical shape (or clarify what is meant here).**

This means the particle depolarisation ratio is higher when the particles are more non-spherical. The sentence about the depolarisation ratio has been changed to clarify this statement.

• **p5, l31: An AOT of 0.1 at 500 nm seems rather high compared with the baseline value of 0.05 suggested by Kaufman (2001). Please comment.**

The baseline value of 0.05 suggested by Kaufman (2001) refers to the AOT over the Pacific Ocean. He suggests a baseline value of 0.071 for the Atlantic but also mentioned that this differences can be caused by differences in the meteorological conditions which change the strength of the baseline aerosol sources. Furthermore he explained that contamination by pollution cannot be ruled out. We state an AOT  $0.09 \pm 0.01$  and  $0.09 \pm 0.02$ , which are close to the suggested baseline values of 0.07. Furthermore, the AOT of 0.09 correlates with values measured during ACE 1 (Quinn and Bates, 2005) and the comparative study of

Smirnov et al.(2002), who summarizes the results of 75 publications and points out that the AOT over remote oceanic areas (not influenced by desert dust) is smaller than 0.12.

• **p6, l28: Zieger et al. (2017) might be a better reference regarding the composition and deliquescence of sea salt aerosols.**

The reference was changed to Zieger et al. (2017).

• **p7, l5-8: Note that the aerosol layer above the MBL shows much lower beta and alpha, i.e. exponents are the ratio of small numbers.**

We agree. The statement is omitted due to the high uncertainty of the Ångström exponent in this region.

• **p8, l32: What are the times of the SPM measurements?**

The sun photometer measurements are performed manually between 9 and 18 whenever the view to the sun was free of clouds. Although it was tried to perform measurements regularly, there are no fixed times.

• **p9, l18: exponents of 1.6 indicate small particles.**

This has been changed in the revised manuscript.

• **p10, l6: What criteria have been applied to select the measurement period for analysis (see major comment 2)?**

All suitable Raman measurements i.e. good weather conditions and instrument status were selected for this analysis. A comment on the selection of the measurements was added and moved to the beginning of the statistical analysis section.

• **p10, l14-16: Move to figure caption.**

To explain these figures also in the text, we decided to keep this two sentences.

• **p12, l 12: Where does this information come from? Is it the cloud cover along the ship's track or over the entire hemisphere?**

This is approximately the fraction of the time that we couldn't analyse the lidar data because of low clouds along the cruise track. This statement was clarified.

• **p13, l6-23: Just provide the conclusion of this investigation in a short statement. If there's no added value in Figure 16, it should be omitted.**

We decided to keep the description because we want to keep Figure 16 to demonstrate the potential of the Ångström exponent for particle classification.

• **Figure 1: This figure could be omitted. If you decide to keep it, remove the tracks of cruises that are not being referred to in this work.**

We decided to keep the figure to provide a picture of the cruise tracks, but removed the not referred cruise tracks. Furthermore, the location of Polarstern at the time of the case studies were added referring to a suggestion by Ali Omar.

- **Figures 2 and 3: Are the values from the Microtops daily means?**

Yes, they are. Clarification was added in the caption.

- **The white bars are barely visible. Please explore other options for marking the case studies.**

White bars are now thicker, additionally grey bars above the colour plot and arrows below were added and an explanation is given in the caption.

- **Figure 4: Plot only to 1 km height and mark time period shown in Figure 5.**

The presentation height was reduced to 2km. Explanation of the white bars is added in the caption.

- **Figures 6, 7 and 8: Omit but leave the description of the origin of the observed air masses in the text.**

We keep the trajectories and the dust load figure for a better demonstration of the origin of the air masses. However we combined Figure 7 and 8.

- **Figure 9: Plot only to 5 km height. Add explanation of the white bars to the caption.**

To show also the atmosphere above the layer we decided to keep the presentation up to 6 km in Figure 9 (now Figure 8). Explanation of the white bars is added in the caption.

- **Figure 11: Plot only to 4 km height. Add explanation of the white bars to the caption.**

Figure 11 (now Figure 10) is now only shown up to 5km. Explanation of the white bars is added in the caption.

- **Figure 13: Omit or combine in one panel. Not all trajectories have to be shown in their entirety.**

We agree. The trajectories are now combined in one panel.

- **Figure 14: Please explore if part of this data set might be better presented in the form of histograms.**

The amount of data points is insufficient to create expressive histograms.

- **Figure 15: How do these findings compare with Burton et al. (2012) or Gross et al. (2015)?**

The values of the denoted aerosol categories in Figure 15 (now Figure 14) are comparable with the aerosol classifications shown by Burton et al. (2012) and Groß et al. (2015). A reference to Groß et al. (2015) and Burton et al. (2012) is given in the text.

- **Figure 16: Omit.**

We decided to keep this presentation to present a complete picture and show also the Ångström exponent and demonstrate that the Ångström exponent is not suitable for particle classification in this study.

- **Table 1: Omit. The relevant information is already provided in the text.**

Table 1 is omitted in the revised manuscript.

# Ship-borne aerosol profiling with lidar over the Atlantic Ocean: From pure marine conditions to complex dust-smoke mixtures.

Stephanie Bohlmann<sup>1,2</sup>, Holger Baars<sup>1</sup>, Martin Radenz<sup>1</sup>, Ronny Engelmann<sup>1</sup>, and Andreas Macke<sup>1</sup>

<sup>1</sup>Leibniz Institute for Tropospheric Research, Permoserstraße 15, 04318 Leipzig, Germany

<sup>2</sup>now at: Finnish Meteorological Institute, P.O. Box 1627, 70211, Kuopio, Finland

*Correspondence to:* Stephanie Bohlmann (stephanie.bohlmann@fmi.fi )

**Abstract.** The multiwavelength Raman lidar Polly<sup>XT</sup> has been regularly operated aboard the research vessel Polarstern on expeditions across the Atlantic Ocean from North to South and vice versa. The lidar measurements of the **RV** Polarstern cruises PS95 from Bremerhaven to Cape Town (November 2015) and PS98 from Punta Arenas to Bremerhaven (April/May 2016) are presented and analysed in detail. The latest set-up of Polly<sup>XT</sup> allows improved coverage of the marine boundary layer (MBL) due to an additional near-range receiver.

Three case studies provide an overview of the aerosol **detected** over the Atlantic Ocean. In the first case, marine conditions were observed near South Africa on the autumn cruise PS95. Values of optical properties (depolarisation ratios close to zero, lidar ratios of 23 sr at 355 nm and 532 nm) within the MBL indicate pure marine aerosol. A layer of dried marine aerosol, indicated by an increase of the particle depolarisation ratio to about **10 % at 355 nm (9 % at 532 nm)** and thus confirming the non-sphericity of these particles, could be detected on top of the MBL. On the same cruise, an almost pure Saharan dust plume was observed near the Canary Islands, presented in the second case. The third case deals with several layers of Saharan dust partly mixed with biomass-burning smoke measured on PS98 near the Cape Verde Islands. While the MBL was partly mixed with dust in the pure Saharan dust case, an almost marine MBL was observed in the third case.

A statistical analysis showed latitudinal differences in the optical properties within the MBL, caused by the down-mixing of dust in the tropics and anthropogenic influences in the northern latitudes, whereas the optical properties of the MBL in the southern hemisphere correlate with typical marine values. The particle depolarisation ratio of dried marine layers ranged between 4–9 % **at 532 nm**.

Night measurements from PS95 and PS98 were used to illustrate the potential of aerosol classification using lidar ratio, particle depolarisation ratio at 355 nm and 532 nm and Ångström exponent. Lidar ratio and particle depolarisation ratio have been found to be the main indicator for particle type, whereas the Ångström exponent is rather variable.

## 1 Introduction

Aerosols, solid or liquid particles dispersed in air, play an important role in the Earth's climate system. By scattering and absorbing solar and terrestrial radiation, aerosols highly affect the radiation fluxes and thus the radiative budget. Besides this direct aerosol radiative forcing, aerosols also modify the microphysical properties of clouds by acting as cloud condensation or

ice nuclei, and thereby influence the radiative budget indirectly (Twomey, 1977). Furthermore, the presence of aerosol particles influence the lifetime of clouds (Albrecht, 1989).

As the impact of aerosols on the climate system is various, it has to be considered in climate modelling to receive accurate results. Which is, however, challenging because not all aerosol types contribute to the aerosol radiative forcing in the same way (Ocko et al., 2012; Myhre et al., 2013) and additionally, information about global aerosol distributions is rare due to its high spatial and temporal variability. Thus, uncertainties in aerosol forcing and the poor understanding of aerosol-cloud interactions represent a large uncertainty in current climate models despite the progress in observing and modelling climate-relevant aerosol properties and atmospheric distributions in the last years (IPCC, 2013). More information about the horizontal and vertical distribution of different aerosol types is needed to further improve climate modelling and prediction and to understand its complex interaction with the atmosphere. Therefore, the observation of the spatio-temporal aerosol distribution is an objective in a wide range of research projects. **Besides satellite observations, most projects concentrate on observations over land.** Since about 70 % of the Earth's surface is covered by water, aerosols and their distribution have to be investigated over the oceans as well, even though the investigation is more challenging.

Light detection and ranging (LIDAR) represents a key method to investigate vertically resolved **aerosol properties**. Measurements with high spatial and temporal resolution and under ambient conditions are possible up to an altitude of 100 km depending on the lidar set-up (Wandinger, 2005). Many institutes all over the world are performing lidar measurements and create networks as shown in the 178th GAW report (Bösenberg et al., 2007). While the northern hemisphere is well covered with observation sites, there are only a few lidar stations in the southern hemisphere. Over the oceans aerosol measurements are rare and to our knowledge no regular, vertically resolved measurements allowing aerosol typing are performed from ground. To close this gap, the OCEANET project was initiated to investigate the transport of material and energy between ocean and atmosphere. The OCEANET project is a collective project of several German research institutes and combines oceanographic measurements with atmospheric observations on a ship-borne platform. It is regularly **deployed** on research vessels (RV), **such as** the RV Polarstern. One instrument within the OCEANET facility is the portable and automated Raman and polarisation lidar system Polly<sup>XT</sup> (Althausen et al., 2009; Engelmann et al., 2016). This lidar system allows aerosol typing and investigations of the atmosphere up to about 20 km.

The first cruise with Polly<sup>XT</sup> on the RV Polarstern took place in 2009. Since then, eight cruises have been performed on the RV Polarstern between Bremerhaven and Punta Arenas and Bremerhaven and Cape Town until summer 2016, covering almost the whole north-south extension of the Atlantic Ocean. **Typical cruise tracks are shown in Fig. 1.** These measurements therefore represent a valuable contribution to the **knowledge of distribution and variability of aerosols** over the Atlantic. The first cruises have already been analysed by Kanitz et al. (2013, 2014). Saharan dust and mixtures of biomass-burning smoke and dust were observed at the west coast of North Africa as well as Patagonian dust over the South Atlantic. The lidar system **used for these measurements** did not cover the **lowermost** 500–800 m of the troposphere, therefore the marine boundary layer (MBL) could not be investigated. However, the investigation of optical and microphysical properties of pure marine aerosol is essential, as this knowledge is used in retrievals for space-borne instruments like CALIPSO (**Cloud- Aerosol Lidar and Infrared Pathfinder Satellite Observation, Omar et al., 2009**) which are able to investigate aerosols globally and thus also

over the ocean but with limited capabilities. As land-based observations of aerosols mostly do not allow **observation of** pure marine conditions, **only** shipborne observations are suited to make detailed studies of the marine environment found over the oceans. Polly<sup>XT</sup> has been further developed since these first cruises. The latest set-up (Engelmann et al., 2016) possesses now, **in addition** to the original capabilities, four near-range channels and depolarisation measurements at two wavelengths. Due to a new near-range detection unit, the height of complete overlap between receiver field-of-view and laser beam was reduced from about 1500 m to 120 m and now enables measurements close to the lidar. Observations with this advanced lidar set-up over the ocean offer the unique opportunity to investigate the MBL in addition to the aerosol conditions in the free troposphere, which was not possible until now. **In this paper three case studies covering typical aerosol conditions during the cruises PS95 and PS98 will be discussed to investigate the whole atmospheric column above the ship. A statistical analysis is presented contrasting the zonal dependence of the aerosol conditions over the Atlantic. In Section 2 the Raman-lidar Polly<sup>XT</sup>, the aerosol characterisation by optical properties and the respective data analysis methods are briefly introduced. Section 3 gives an overview of the lidar measurements during PS95 and PS98, discusses the case studies and shows a statistical analysis of both cruises. In Section 4 the results are summarised.**

## 2 Instrument and methods

The lidar measurements during the Atlantic cruises were performed with the portable Raman and polarisation lidar system Polly<sup>XT</sup>-OCEANET. A detailed description of the optical set-up can be found in Althausen et al. (2009) and Engelmann et al. (2016).

The latest set-up of Polly<sup>XT</sup>-OCEANET enables the measurement of backscatter coefficient profiles at 355, 532 and 1064 nm and extinction coefficient profiles at 355 nm and 532 nm. Furthermore, depolarisation measurements at 355 nm and 532 nm are possible. A second detection unit enables measurements near the lidar at 355 nm and 532 nm and the corresponding Raman wavelengths 387 nm and 607 nm down to about 120 m above the lidar (Engelmann et al., 2016).

The backscatter coefficient  $\beta$  describes the amount of the light backscattered to the lidar at an angle of 180°. The attenuation of the emitted light due to absorption and scattering on the way through the atmosphere is described by the extinction coefficient  $\alpha$ . The ratio of extinction to backscatter coefficient is called lidar ratio  $S$ . As the extinction is the attenuation of light due to scattering and absorption, the lidar ratio can be used to determine the absorbing capacity of the backscattering particles. Absorbing aerosols like soot have a much higher lidar ratio than non-absorbing particles like sea salt (Müller et al., 2007; Groß et al., 2011). The relationship of the backscatter or extinction coefficient at two wavelengths  $\lambda_1$ ,  $\lambda_2$  as a function of the ratio of these wavelengths is given by the backscatter or extinction-related Ångström exponent  $\mathring{A}$  (Ångström, 1929). It indicates the particle size. Small particles show a strong wavelength dependence, thus  $\mathring{A}$  is greater than 1. In contrast, the scattering on large particles is almost wavelength independent and  $\mathring{A}$  is approximately zero (Eck et al., 1999; Müller et al., 2007; Baars et al., 2016).

The emitted laser light of the Polly<sup>XT</sup> lidar is linear polarised. In the atmosphere, the light is depolarised when scattered by non-spherical particles like dust or ice crystals. The detected light therefore contains a cross-polarised component in addition

to the parallel polarised light and can be detected separately. The ratio of cross-polarised to parallel-polarised light backscattered by particles is called particle depolarisation ratio. If the particles are mainly spherical, the particle depolarisation ratio is about zero because the linear polarised light has been **returned** to the lidar without changing the polarisation shape within the particle or its edges. **Non-spherical particles show higher depolarisation ratios. This quantity therefore enables the**

## 5 **determination of the particle sphericity.**

Ångström exponent, lidar ratio and depolarisation ratio are indicators of the aerosol type. By knowing typical values of the lidar ratio, Ångström exponent and particle depolarisation ratio, the dominant particle type can be specified.

**The retrieval of those lidar derived parameters from Polly<sup>XT</sup> measurements and the corresponding error estimation is described in detail by Baars et al. (2016) and Engelmann et al. (2016) and based on well established lidar retrievals (Klett, 1981; Fernald, 1984; Ansmann et al., 1992; Murayama et al., 1999). All Instrumental effects (dead-time correction, overlap correction, background subtraction) have been considered and the high quality standards of EARLINET (Pappalardo et al., 2014) have been applied to characterize the instrument.**

**For the data analysis in this study vertical smoothing lengths between 127 m and 457 m were applied depending on the signal to noise ratio. Details are given within the figure captions. GDAS1 data were used for the data analysis as soundings upon RV Polarstern were only launched once a day during noon. The marine boundary layer top is determined following the procedure described in Baars et al. (2008).**

## 3 Results

### 3.1 Lidar observations during RV Polarstern cruises across the Atlantic

The temporal development of the range-corrected signal (i.e. the uncalibrated attenuated backscatter signal) of the autumn transit cruise PS95 is shown in Fig. 2 (middle panel). RV Polarstern departed on 29 October 2015 from Bremerhaven (**Germany**) and arrived on 1 December 2015 at Cape Town (**Republic of South Africa**). The first days of this cruise were characterised by low-level clouds and rain indicated by **high signals (white colours)**. On 9 November (33° N), the lidar could detect a lofted plume of Saharan dust above the MBL between 600 m and 3 km height. From 12 November (24° N), increasing depolarisation in the MBL could be observed (Fig. 2, lower panel) resulting from deposition and downmixing of dust from higher altitudes. The dust top height decreased from 2.8 km on 11 November down to 1.5 km on 13 November. About noon on 14 November 2015, a new dust plume with a lower volume depolarisation ratio and a dust top height of 3.5 km was observed. **RV Polarstern** steadily moved towards the equator so that the dust region was left behind in the night to 18 November (3° N). After entering the southern hemisphere on 19 November, marine stratocumulus clouds occurred frequently. Around noon on 23 November (10° S), minor traces of dust between 1 km and 4 km could be observed again. Considering HYSPLIT trajectories (not shown), these depolarising layers could consist of dust from the Kalahari Desert. From 24 November (12° S) onwards, the sky was mostly overcast. At the end of the cruise, on 29 and 30 November, almost pure marine conditions could be observed. The 500 nm **aerosol optical thickness (AOT)**, measured with a Microtops sun photometer, ranged around 0.1 on the northern



hemisphere, increased in the dust influenced northern tropics to around 0.5 and decreased below 0.1 in the southern hemisphere.

The spring transit cruise PS98 started on 11 April 2016 in Punta Arenas (Chile) and ended on 11 May 2016 in Bremerhaven. Time series of the range corrected signal and volume depolarisation ratio at 532 nm are shown in Fig. 3. Because of a failure of the 1064 nm photomultiplier tube (PMT) no measurements at this wavelength were available. After starting regular measurements in the night to 13 April, the weather was dominated by clouds. In the night from 14 to 15 April (40° S), thin depolarising layers at around 2.5 km could be observed. According to HYSPLIT backward trajectories (not shown), the air mass originated from the Patagonian region, thus the layers could contain traces of Patagonian dust. Observations on 16 and 17 April were dominated by low clouds and rain. From 22 April (12° S) to 25 April (4° S), a lofted dust plume between 1.5 km and 3.5 km height could be detected. Crossing the Intertropical Convergence Zone (at around 5° N) on the 27 and 28 April, thunderstorms, rain showers and clouds with low base heights were predominant. After leaving this region, the lidar observed Saharan dust above the marine boundary layer again. The bottom height of the dust layer decreased from 1.5 km on 22 April down to around 600 m on 30 April. In the afternoon of 1 May (23° N), **RV** Polarstern left the dust region. After a short stop at the port of Las Palmas (Gran Canaria, Spain) on 3 May, the cruise was continued towards the European continent and the aerosol conditions were more and more influenced by anthropogenic sources. From 6 May onwards, mostly overcast sky with small cloud gaps was predominant. The AOT at 500 nm showed a similar zonal behaviour as on the PS95 cruise. The AOT at 500 nm was below 0.1 in the southern hemisphere, except for the 17 April, and steadily increased to the maximum of 0.37 on 30 April. After leaving the dust influenced region, the AOT ranged between 0.1–0.2 in the northern hemisphere.

Regular cruises across the Atlantic Ocean from North to South in the northern hemispheric autumn and from South to North in the northern hemispheric spring provided a large amount of lidar data over the Atlantic. Dust is regularly observed in the northern tropics and subtropics west of the Saharan desert. The AOT at 500 nm, measured with a Microtops sun photometer, is slightly higher in the northern than in the southern hemisphere which indicates a higher aerosol load in the former.

## 3.2 Case studies

Three night measurements from PS95 and PS98 were selected to present typical atmospheric conditions by means of a detailed discussion of the optical properties in the MBL and in lofted layers. First, almost pure marine conditions with an overlying dried marine aerosol layer during the autumn cruise PS95 are discussed. Second, a case study on the same cruise but with Saharan dust near the Canary Islands is presented. Third, a case during the spring cruise 2016 (PS98) with Saharan dust and biomass-burning aerosol mixtures near the Cape Verde Islands is shown. **These three case studies are marked with black stars on the cruise tracks (Fig. 1) and with white bars in the cruise overviews (Fig. 2,3).**

30

### 3.2.1 PS95 - Marine aerosol conditions

**On 29 and 30 November 2015 at the end of the cruise PS95, clean conditions could be observed near Cape Town. In this area, the dominant aerosol was of marine origin according to CALIPSO aerosol classification (Omar et al., 2009).**

In Figure 4, the time series of the range-corrected signal at 1064 nm and the volume depolarisation ratio at 532 nm from 29 and 30 November 2015 are shown. Additionally, the AOT at 500 nm and the Ångström exponent at 440/870 nm retrieved by sun photometer measurements are shown in the upper panel. Mean AOT at 500 nm of  $0.09 \pm 0.01$  on 29 November ( $0.09 \pm 0.02$  on 30 November) and an Ångström exponent of  $0.08 \pm 0.02$  ( $0.23 \pm 0.08$ ) clearly indicate marine conditions for remote oceanic areas, not influenced by continental aerosol sources. **In these regions, the AOT at 500 nm is typically below 0.1 and the Ångström exponent less than 0.4 (Smirnov et al., 2006).**

The time series of the volume depolarisation ratio shows a thin layer of enhanced depolarisation at the top of the MBL at 300–400 m. This layer consists of dried marine particles and will be discussed later in this Section.

Mean profiles of the measured optical properties are shown in Fig. 5 for 30 November 01:15–02:30 UTC. In the right panel, GDAS1 and radio sounding profiles are shown. **The temperature inversion and decrease of the relative humidity as well as the strong decrease of the backscatter signal (Baars et al., 2008) suggest the MBL top height at about 300 m.** Within the MBL, the lidar ratio was  $23 \pm 2$  sr at 355 nm and  $23 \pm 1$  sr at 532 nm, which agrees with results during the second Aerosol Characterization Experiment ACE-2 ( $S_{532}$   $23 \pm 3$  sr; Müller et al., 2007) and are slightly higher than results of the Saharan Mineral Dust Experiment SAMUM-2a ( $S_{532}$   $18 \pm 4$  sr and  $S_{355}$   $18 \pm 2$  sr; Groß et al., 2011).

The special highlight in this case study is the increase of the depolarisation ratio at the top of the MBL, **whereas the lidar ratio within this layer is low,  $16 \pm 1$  sr (355 nm) and  $13 \pm 3$  sr (532 nm). Thus, this layer cannot consist of biomass burning aerosol or dust mixtures.** The particle depolarisation ratios at 355 nm and 532 nm are around zero in the MBL (large, spherical particles) and increase from 300 m to about 450 m, shortly above the MBL top. After this peak, the depolarisation decreases to about zero again. Considering the profiles of relative humidity and temperature, a correlation with the relative humidity is obvious. The relative humidity (RH) decreases from about 90 % near the ground to under 20 % above 600 m. In the layer the RH is about 50 % according sounding data and about 40 % according to GDAS1. Simultaneously the temperature increases. HYSPLIT backward trajectories (Fig. 6) indicate that the air parcels arriving at 300, 600 and 1000 m had only been carried over the South Atlantic Ocean the last 7 days, thus it can be assumed that the airmass contains mostly marine aerosol, e.g. sea salt. Sea salt aerosol exists as dry particles at low relative humidity. Since sea salt is hygroscopic, the salt particles absorb water to form droplets when the RH exceeds the deliquescence relative humidity, **which is around 70–74 % depending on the composition of the sea salt (Tang et al., 1997).** If the RH decreases to the crystallisation relative humidity (**45–48 %; Tang et al., 1997**), the particles crystallise from the droplet. At a RH above the **crystallisation relative humidity**, the sea salt particles are in solution with water and show low values of  $\delta \approx 3\%$  (Tesche et al., 2011a). When the RH is below the **crystallisation relative humidity**, the sea salt particles crystallise and exist as non-spherical particles due to the cubic shape of NaCl, the main **constituent** of sea salt aerosol (Zieger et al., 2017). As non-spherical particles they cause higher depolarisation ratios. In this case, dried sea-salt particles caused depolarisation ratios up to 9 % at 532 nm and 10 % at 355 nm. Previous studies showed similar results. Murayama et al. (1999) measured high depolarisation ratios ( $\approx 10\%$ ) at 532 nm in the lower atmosphere associated with sea breeze events in the coastal area of Tokyo Bay. During the Saharan Aerosol Long-range Transport and Aerosol-Cloud-interaction Experiment (SALTRACE) winter campaign 2014 at Barbados, Haarig et al. (2017) detected an increase of the particle depolarisation ratio up to 12 % at 355 nm, 15 % at 532 nm and 10 % at 1064 nm when the

RH drops below 50 %. Sakai et al. (2000) observed low depolarisation ratios (<5 %) at 532 nm over a wide range of relative humidities, whereas  $\delta^{par} > 10\%$  was measured at low RH (<50 %) in air masses which had passed over the Pacific Ocean. In a laboratory chamber experiment, Sakai et al. (2010) found linear depolarisation ratios at 532 nm of  $1 \pm \leq 0.1\%$  for droplets,  $8 \pm 1\%$  for sea salt crystals and  $21 \pm 2\%$  for NaCl crystals.

5 Thus, we can conclude that marine particles were transported above the MBL top, dried and crystallised and therefore cause a high particle depolarisation ratio even though the backscattering is low compared to the MBL.

This case confirms that marine aerosol can cause depolarisation in the lidar signal when RH is low. Without considering this property of marine aerosol, aerosol layers above the MBL causing depolarisation may be falsely classified. Automatic classification algorithms like the ones for CALIPSO, EarthCARE and other lidars should take these feature into account, **if**

10 **relative humidity measurements are available**, to not mis-classify these aerosols as, e.g., mixed dust.

### 3.2.2 PS95 - Saharan dust

When RV Polarstern approached the Canary Islands during the autumn cruise 2015, the first dust plume was observed in the evening of 10 November at around 28° N. The dust could be measured until 14 November.

Figure 7 (**left**) presents the column integrated concentration on 11 November 2015 12:00 UTC from the BSC-DREAM8b model (Dust REgional Atmospheric Model), operated by the Barcelona Supercomputing Center. The increased column dust load above the Atlantic at the position of **RV** Polarstern is illustrated by dark green colour. According to HYSPLIT backward trajectories (Fig. 7, **right**), the air mass measured on 11 November 20 UTC originated from the Saharan desert. Only air masses that arrived at 3 km had been carried also over European areas in the last 7 days.

The range-corrected signal at 1064 nm and the 532 nm volume depolarisation ratio of the first dust plume are shown in Fig. 8. Additionally, sun photometer measurements from 11 and 12 November are given. The sun photometer retrieved Ångström exponent at 440/870 nm is 0.13 on 11 November and 0.08 for the day after. The daily averaged AOT at 500 nm for these days is 0.38 (11 November) and 0.58 (12 November). The dust layer reached heights about 3 to 3.5 km on 11 November and slightly descended towards the 14 November. From 13 November lofted layers between 2–3.5 km with a lower depolarisation ratio than the first dust plume could be observed.

25 Averaged profiles of the measured optical properties and radio sounding and GDAS1 profiles of temperature and relative humidity are shown in Fig. 9 for 11 November 19:30–21:00 UTC (white frame Fig. 8). **Backscatter profiles show an increased backscatter coefficient at all wavelengths from the MBL top (around 400 m) up to 2.8 km.** The backscatter coefficient **at 532 nm is larger than at 355 nm**, whereas the extinction coefficient is wavelength independent. Even though, this is an **atypical** spectral behaviour, comparable observations of higher 532 nm than 355 nm backscatter coefficient **have** already **been**

30 observed in dust layers near the Cape Verde Islands (Rittmeister et al., 2017), in the eastern Mediterranean at Crete (Tsekeri et al., 2017) and during the SHADOW (Study of SaHArAn Dust Over West Africa) campaign in Senegal (Veselovskii et al., 2016). According to Veselovskii et al. (2016), this spectral behaviour may be caused by specific refractive index characteristics induced by the chemical composition of the particles. The mean lidar ratio at 532 nm (355 nm) in the height of the lofted aerosol layer is  $53 \pm 2$  sr ( $61 \pm 4$  sr). The lidar ratio at 355 nm is higher than at 532 nm, which results from the higher backscatter coeffi-

cient at 532 nm and agrees with values found for dust during the SHADOW campaign (Veselovskii et al., 2016). Consequently, the mean backscatter-related 355/532 nm Ångström exponent is negative ( $-0.4 \pm 0.1$ ). Negative backscatter-related Ångström exponents are generally found when scattering properties of dust are modelled by assuming a spheroidal shape distribution. The values then typically vary between -0.5 and -2 depending on the assumptions of the spectral refractive index and the size and shape distributions. The extinction-related **Ångström exponent** at 355/532 nm of  $0.1 \pm 0.5$  and the backscatter-related **Ångström exponent** at 532/1064 nm of  $0.4 \pm 0.1$  are in good agreement with values for dust measured during SAMUM-2b ( $\mathring{A}_{ext}^{355/532} \approx 0.22 \pm 0.27$ ,  $\mathring{A}_{bsc}^{532/1064} \approx 0.45 \pm 0.16$ ; Tesche et al., 2011a). Furthermore, the aerosol layer between 600 m and 2.8 km is characterised by a nearly height constant particle depolarisation ratio of  $29 \pm 1$  % at 532 nm and  $25 \pm 1$  % at 355 nm. The increased particle depolarisation ratios indicate a non-spherical particle shape and are in good agreement with values found for pure dust during SAMUM-2a ( $\delta_{532}^{par} \approx 30$  % and  $\delta_{355}^{par} \approx 25$  %; Groß et al., 2011; Tesche et al., 2011a). The fraction of dust and smoke can be estimated using a method described by Tesche et al. (2009). Assuming a  $\delta_{532}^{par}$  of 31 % for pure dust and 5 % for smoke, the fraction of dust in this layer amounts over 90 % (Fig. 9, panel 6) and can therefore be considered as pure dust. The MBL reached a height of about 400 m according to the backscatter profile. Lidar ratios at 532 nm and 355 nm are  $30 \pm 3$  sr and  $30 \pm 2$  sr in the MBL, which are higher than the characteristic values for marine aerosol (see marine case study Sec. 3.2.1) and suggest a mixture of marine aerosol with other particles. Particle depolarisation ratios are also slightly higher, 9 % at 532 nm and 6 % at 355 nm, and indicate the mixing of dust into the MBL. Therefore also the MBL is influenced by the frequent dust emission in the Saharan desert.

### 3.2.3 PS98 - Mixed aerosol layers

During the spring cruise PS98, extended aerosol layers with enhanced depolarisation were observed near the Cape Verde Islands. The range-corrected signal and volume depolarisation ratio at 532 nm as well as Microtops sun photometer measurements on 29 April 2016 are shown in Fig. 10. **Sun photometer measurements determined an average AOT at 500 nm of 0.23 and an Ångström-Exponent of 0.9 for 440/870 nm.**

An increased backscatter coefficient at both wavelengths indicates aerosol layers between 0.9–3 km. These layers are separated from the MBL, which reached a height of about 500 m according to the increased backscatter signal and GDAS1/radio sounding data. The mean lidar ratio at 355 nm is  $22 \pm 1$  sr, the mean backscatter-related 355/532 Ångström exponent amount  $0.9 \pm 0.0$  and the mean particle depolarisation ratios are around zero at both wavelengths in the MBL. These values are indicators of a pure marine boundary layer without dust (see marine case, Sec. 3.2.1).

Mean profiles of the optical properties averaged from 29 April 2016 between 20:15–21:00 UTC are shown in Fig. 11. Regarding the backscatter profile, the aerosol-laden region above the MBL can be divided into **five layers. The layers extend from 0.9–1.2 km, 1.3–1.6 km, 1.7–2.2 km, 2.3–2.5 km and from 2.6–3.0 km and are marked grey in Fig. 11.** The 532 nm near-range extinction coefficient and lidar ratio was not reliable because of a misalignment of the 532 nm near-range channel which do not affect the Raman backscatter retrievals. The mean lidar ratio in the first layer is  $48 \pm 4$  sr and  $46 \pm 9$  sr at 532 nm and 355 nm, respectively. The mean backscatter-related 355/532 Ångström exponent is  $0.4 \pm 0.1$  and range between the typical values of dust ( $0.16 \pm 0.45$ , SAMUM-2b) and smoke ( $0.90 \pm 0.26$ , SAMUM-2a; Tesche et al., 2011b). Same applies for the

mean particle depolarisation ratio, which is  $20 \pm 2\%$  at 532 nm and  $15 \pm 2\%$  at 355 nm. These values are in good agreement with values for dust and smoke mixtures measured during SAMUM-2a ( $\delta_{355,532}^{par} \approx 16\%$ ; Tesche et al., 2011a) **and represent a dust fraction of 63 % applying the method described by Tesche et al. (2009), shown in Fig. 11 (panel 6).**

The second layer extends from 1.3–1.6 km. The mean lidar ratio is  $57 \pm 7$  sr and  $63 \pm 8$  sr at 532 nm and 355 nm, respectively.

5 Mean backscatter and extinction-related  $\text{\AA}$  at 355/532 nm amount  $0.1 \pm 0.1$  and  $0.4 \pm 0.2$ , respectively. The mean particle depolarisation ratio of  $24 \pm 2\%$  at 532 nm and  $19 \pm 2\%$  at 355 nm suggest a mixture of **depolarising dust and non-depolarising smoke with a dust fraction of 77 % after Tesche et al. (2009).**

**In the third layer, mean lidar ratio amount  $40 \pm 6$  sr at 532 nm and  $50 \pm 6$  sr at 355 nm. The mean backscatter and extinction-related  $\text{\AA}$  at 355/532 nm is  $0.4 \pm 0.1$  and  $1 \pm 0.4$ , respectively. This indicates the presence of small, absorbing**  
10 **particles. The particle depolarisation ratio,  $13 \pm 0.1\%$  at 532 nm and  $9 \pm 1\%$  at 355 nm, is small compared to the other layers. Therefore it can be concluded that this layer contains a significant amount of non-depolarising particles like smoke. After Tesche et al. (2009) the fraction of dust is only around 35 %.**

**Between 2.3–2.5 km, in the fourth layer, particle depolarisation ratio rises again ( $18 \pm 1\%$  at 532 nm,  $14 \pm 3\%$  at 355 nm).**

15 **The mean lidar ratio amount  $40 \pm 11$  sr at 355 nm and  $42 \pm 3$  sr at 532 nm. The mean backscatter and extinction-related  $\text{\AA}$  at 355/532 nm is  $0.26 \pm 0.06$  and  $0.08 \pm 0.80$ . After Tesche et al. (2009) the fraction of dust in this layer is around 55 %.**

**The fifth layer is characterised by a high lidar ratio up to 88 sr at 532 nm and 68 sr at 355 nm and high backscatter and extinction-related  $\text{\AA}$ ngström exponents of  $0.4 \pm 0.2$  and  $1.6 \pm 0.6$ , respectively. Particle depolarisation ratios decrease with increasing height and amount around 16 % at 532 nm (13 % at 355 nm) at the lower edge and 8 % at 532 nm (5 % at 355 nm) at the top. Using the dust-smoke separation method described by Tesche et al. (2009), the dust fraction de-**  
20 **creases from 47 % to 14 % within this layer.**

Figure 12 presents the HYSPLIT backward trajectories for the last 10 days arriving at the position of **RV** Polarstern at different altitudes. Air masses arriving in the MBL (500 m) had been carried only over the Atlantic Ocean the last 10 days and therefore contained mostly marine aerosol. Air masses arriving between 1–3 km were advected from the African continent. The air masses arriving at 1 km height originated from the Saharan desert and passed over active fire areas south west of the Saharan  
25 desert 6 days before arriving at the position of **RV** Polarstern. Trajectories arriving at 1.5 km and 2 km also passed over the Saharan desert and active biomass-burning regions, but have never been close to the ground. As investigated by Nisantzi et al. (2014), fires can support the upward transport of dust into the free troposphere. A high amount of dust besides biomass-burning aerosol could therefore also be detected in these altitudes. In contrast, air masses arriving at 2.5 km and 3 km were on ground level over active fire regions for several days and could take up a high amount of biomass-burning aerosol.

30 **During this night measurement, five layers with different fractions of dust and smoke could be detected. At the same time, the MBL was almost pure marine without mixed-in dust or smoke particles. This case study shows that the MBL is not always influenced by dust and smoke transport and different aerosol types can occur at the same time above the Atlantic.**

### 3.3 Statistical analysis

A statistical analysis of all Raman measurements with suitable weather conditions and signal quality was performed to provide an overview of latitudinal differences and characteristics of the different aerosol types observed over the Atlantic. A total of 45 night measurements from PS95 and PS98 were selected for analysis with respect to optical aerosol properties. Each measurement was screened for separated aerosol layers. The MBL and, when present, elevated aerosol layers and layers of dried marine aerosol, as presented in the first case study, have been analysed separately. These layers with enhanced depolarisation ratio directly above the MBL will be named dried marine layers.

#### 3.3.1 Time series

The MBL top height and the extent of analysed elevated aerosol layers and dried marine layers are shown in the first row of Fig. 13 for PS95 (left) and PS98 (right), illustrated with blue dots and black and red bars, respectively. The MBL top height ranges between 300 m and 900 m and shows no clear latitudinal trend. Mean values of extinction coefficient, lidar ratio and particle depolarisation ratio at 532 nm and the backscatter-related Ångström exponent at 355/532 nm are shown in the panels below. Blue dots illustrate the MBL mean values derived from near-range measurements. Mean values of the elevated aerosol layers are derived from far-range signals and are illustrated with black dots, whereas mean values of the dried marine layers are illustrated red. These mean values are derived from near range signals. An exception is the measurement at 22° S where the far-range signal is used because of the height of the dried marine layer. Error bars represent the standard deviation. Measurements at 355 nm are not shown for the sake of clarity but show similar results.

Mean MBL lidar ratios during PS95 are around  $25 \pm 3$  sr in the northern latitudes and  $20 \pm 3$  sr in the southern hemisphere. In the region of dust, between 35° N and the equator, the mean lidar ratio in the MBL is  $30 \pm 6$  sr. The increased lidar ratio is caused by downmixing of dust from higher altitudes, whereas the lidar ratio in the southern latitudes correlates with pure marine values. Anthropogenic aerosol from the European continent influences the MBL in northern latitudes, the lidar ratio is therefore slightly higher than for a pure marine environment. High particle depolarisation ratios up to 18 % in the MBL confirm the presence of depolarising particles in the region west of the Sahara, while it is below 1 % in the European influenced North Atlantic and the marine dominated South Atlantic. During PS98, no significant increase of the MBL lidar ratio between 35° N and the equator could be observed. The mixing of dust into the MBL is therefore considered to be low. This is confirmed by a continuous low particle depolarisation ratio of less than 1 % in the MBL throughout the whole cruise. This contrast to PS95 can be explained by seasonal variations in the dust transport and deposition processes over the Atlantic.

Elevated aerosol layers were mainly observed between 30° N and 15° S and show a wide range of mean lidar and particle depolarisation ratios, caused by different particle types in these layers. The mean particle depolarisation ratio in elevated layers decreases from around 30 % at 25° N towards south during PS95, which suggests an increasing mixing

with other less depolarising particles. At 1° S and 12° S during PS95 and in the upper aerosol layers at 15° N and 19° N during PS98, the lidar ratio is higher than the other days (64 sr–88 sr) while the particle depolarisation is low (<10 %). This indicates a mixture with other absorbing, non-depolarising particles like biomass-burning aerosol. During PS98 at 5° S, 2500 km from the African coast, the lidar ratio in 1.5–2.4 km is around 35 sr considerable lower than characteristic values of pure dust ( $S_{532} \approx 55$  sr; Tesche et al., 2011a). This may result from marine aerosol transported upward by turbulent mixing processes (Haarig et al., 2017).

Latitudinal differences can also be seen in the course of the backscatter-related Ångström exponent at 355/532 nm in the MBL during PS95. The mean  $\mathring{A}_{bsc}^{355/532}$  is around 0 in the dust region whereas it is around 1 in the northern and 0.5 in southern latitudes. This suggests a mixture of marine aerosol and large dust particles in the MBL between 35° N and the equator whereas in northern and southern mid-latitudes the fraction of smaller particles dominates. In elevated layers, mean  $\mathring{A}_{bsc}^{355/532}$  range between -0.5 and 0.5. From 30° N to 20° N,  $\mathring{A}_{bsc}^{355/532}$  is negative, in the second part of the plume it becomes positive. According to Veselovskii et al. (2016) a low backscatter-related Ångström exponent indicates an increased imaginary part of the refractive index at 355 nm compared to 532 nm and therefore a higher absorption at 355 nm than at 532 nm. This is a result from different aerosol sources and particle properties. During the second cruise, mean  $\mathring{A}_{bsc}^{355/532}$  range between -0.5 and 1.5. In dusty layers the mean  $\mathring{A}$  is generally smaller than in the MBL, an exception is the upper layer 19° N. In this layer, a high amount of small soot particles cause a high Ångström exponent. Ångström exponents in the MBL do not show indications of downmixed dust during this cruise.

The most prominent feature of dried marine layers is the enhanced particle depolarisation ratio compared to associated MBL to about 4–9 %. Those values are similar to previous observations by Murayama et al. (1999) and Sakai et al. (2000, 2010). Whereas the lidar ratio in the dried marine layer measured during PS95 is slightly lower than in the MBL, it is about 40 sr in the case measured during PS98 but shows high uncertainty in the latter. Mean Ångström exponents are around 0.5 during PS95 and around 1 during PS98, but do not show a clear difference from MBL mean values.

Differences in optical aerosol properties between northern and southern latitudes and the dust-influenced region west of the Saharan desert were detected. Whereas the northern hemisphere is influenced by anthropogenic pollution, southern latitudes are more likely to be influenced by marine aerosols only. Nevertheless, pure marine conditions, not influenced by aerosol originating from the continent, are rare and could only be observed at the end of PS95 near South Africa. Mostly, low-level clouds at top of the MBL at the southern latitudes prohibited the lidar data analysis and thus the evaluation of more cases of pure marine conditions. In about 65 % of the cruise time in the southern hemisphere and 50 % in total during both cruises, clouds along the cruise track did not allow lidar data analysis.

### 3.3.2 Optical properties for particle typing

Mean values of optical properties of the MBL and elevated aerosol layers from PS95 and PS98 (shown in Fig.13) are discussed to illustrate the potential of aerosol classification using intensive optical quantities. Similar to classifications shown by Burton et al. (2012) and Groß et al. (2015) the lidar ratio at 355 nm (532 nm) is presented against the particle depolarisation

**ratio at 355 nm (532 nm) for elevated layers (black), MBL (blue) and dried marine layers (red).** Error bars were omitted for the sake of clarity. **Coloured ellipses denote the different aerosol categories.**

A clear separation of marine and dust influenced MBL measurements can be seen. Pure marine MBL measurements show lidar ratios between 13 sr and 40 sr and particle depolarisation ratios less than 2.5 % at 355 and 532 nm, whereas the particle depolarisation ratio of dust influenced MBL measurements ranges between 5–20 %, caused by a significant amount of non-spherical particles in the MBL. The lidar ratio within these layers also show a tendency to higher lidar ratios with increasing particle depolarisation, caused by dust particles. Elevated aerosol **layers** can be divided into layers with a high particle depolarisation ratio (20–30 %) and a lidar ratio of about 50–60 sr, layers with a lidar ratio between 30 sr and 75 sr and a moderate particle depolarisation ratio (<20 %) and layers with a high lidar ratio (>80 sr) and a low particle depolarisation ratio (<10 %). The first category is considered for pure dust cases, whereas the mixing with other non-depolarising particles are the second category, **named dusty mixtures.** These particles could be spherical marine particles or biomass-burning aerosol. **If** the lidar ratio is higher than reference values of pure dust ( $\approx 55$  sr), the aerosol is considered to be soot, a lower lidar ratio **indicates** a mixture with marine particles. Layers in the third category with lidar ratios greater than 80 sr and a particle depolarisation lower than 10 % are considered as smoke dominated. **Mean values at 355 nm and 532 nm show similar results, although lidar ratios at 355 nm tend to be slightly higher for all aerosol categories.** As clearly seen, some of the mixed aerosol states do overlap and a clear separation by the lidar ratio and depolarisation ratio is not possible.

Therefore, to complete the picture of particle-type dependent optical properties, the backscatter and extinction-related Ångström exponents at 355/532 nm and the backscatter related Ångström exponent at 532/1064 nm are considered for particle type separation in addition to the lidar and depolarisation ratio in Fig. 15. The backscatter and extinction-related Ångström **exponent** as a function of the particle depolarisation ratio (Fig. 15 bottom **face**) **shows** that the Ångström exponent is not a suitable parameter for the separation of pure marine and dust influenced MBL while a clear separation is possible considering the depolarisation ratio (pure marine:  $\delta^{par} < 5\%$ ; aerosol mixtures in the MBL:  $5\% < \delta^{par} < 20\%$ ). For elevated aerosol layers, a slight tendency towards negative backscatter-related Ångström exponents at 355/532 nm with increasing depolarisation ratio values can be seen (Fig. 15 A, C). The extinction-related Ångström exponent at both depolarisation wavelengths is more widely dispersed than the backscatter-related, but show similar patterns (Fig. 15 B, D). In the illustration of the backscatter-related Ångström exponent at 532/1064 nm against the particle depolarisation ratio at 532 nm (Fig. 15 E) no tendency to smaller Ångström exponents with higher depolarisation ratio of the elevated aerosol layers can be observed, thus this parameter is obviously not suitable for a distinction between the different aerosol types. Considering the lidar ratio as a function of the backscatter and extinction-related Ångström exponents (Fig. 15 right **face**), it again becomes obvious that the Ångström exponent is a much less powerful parameter for aerosol typing in a marine environment compared to the lidar ratio and depolarisation ratio.

Resulting from the preceding investigations, we consider the lidar ratio together with the particle depolarisation ratio as best indicators for particle classification above the Atlantic. A clear characteristic in terms of lidar ratio and Ångström exponent for the dried marine layers is not visible. Further observations of those layers are needed to get a comprehensive picture of dried marine aerosol properties.

The values presented above might be valuable information for new aerosol typing schemes needing knowledge from marine



areas at the specific lidar wavelengths as for example for the upcoming EarthCARE mission. **The operated lidar will measure at 355 nm but needs also knowledge on the spectral behaviour of the optical aerosol properties to obtain radiation closure, which is one goal of this mission.**

#### 4 Conclusions

Multiwavelength-Raman-polarisation lidar measurements from two ship-borne cruises across the Atlantic Ocean (**meridional direction**) were analysed. Pure marine, pure dust and dust-smoke mixed conditions were observed. The MBL was often mixed with dust near the equator **and northern sub-tropics** whereas in the outer tropics the marine influence dominated.

One highlight was the observation of dried marine aerosol at the top of the MBL which were relatively often observed during the cruises aboard RV Polarstern but are rarely reported in literature so far. Dried marine particles cause a particle depolarisation ratios up to 9 % correlated with a decreasing relative humidity under 50 %.

In the northern tropics, west of the Saharan desert, various aerosol layers could be observed during the cruises across the Atlantic from North to South in the frame of the OCEANET project. Besides a pure Saharan dust plume with a negative backscatter-related Ångström exponent of  $-0.4 \pm 0.1$  at 355/532 nm near the Canary Islands, Saharan dust layers partly mixed with biomass-burning smoke were observed near the Cape Verde Islands.

A statistical analysis showed latitudinal **differences** and the potential **for** aerosol classification of these cruises. **Optical properties in the MBL were influenced by down-mixing of dust in the tropics and anthropogenic sources in the northern latitudes.** In the southern hemisphere, optical properties of the MBL correlate with typical marine values. The mixing of dust in the MBL was low, confirmed by a continuous particle depolarisation ratio of less than 1 % in the MBL in the southern hemisphere. On both cruises, the MBL-top never exceeded 900 m. Elevated aerosol layers were mainly observed in the northern hemisphere tropics and reached up to 4 km. Layers of dried non-spherical marine aerosol on top of the MBL could be observed only a few times, since in about 65 % of the time in southern hemispheric mid-latitudes, low-level clouds prohibited the processing of the lidar data **for** aerosol properties.

All 45 night measurements from PS95 and PS98 were used to illustrate dependencies between lidar ratio, particle depolarisation ratio and Ångström exponent for the different aerosol types. Lidar ratio and particle depolarisation ratio **are** the main **indicators** for the characterisation of the particle types observed over the Atlantic, whereas the Ångström exponent **is not a good indicator of aerosol type.** Marine, dust and smoke aerosols could be clearly identified with **particle depolarisation and lidar ratio.** **But** care must be taken when layers of dried marine aerosol occur at the top of the MBL, as the enhanced depolarisation ratio (4-9 %) could lead to wrong conclusions **about** the mixing state of the aerosol **by inferring the presence of mineral dust.** We therefore recommend **considering** the relative humidity and the vertical connection to marine layers when performing aerosol typing **over** the Ocean e.g., by space-borne lidars as CALIOP or EarthCARE.

The values obtained increase the knowledge of the aerosol conditions in marine environments which make 70 % of the Earth's surface. Therefore the presented results may also be a valuable contribution for the data analysis of satellite retrievals which

are the only instruments able to cover this large part of the Earth at the moment. The obtained data can also be used to validate and further improve model calculations e.g. by evaluation of the height of the different aerosol layers. **Nevertheless, future studies are needed to expand the knowledge of dried marine aerosol, its drying processes, and interactions with aerosols above and within the MBL.**

*Data availability.* Meteorological data of all RV Polarstern cruises are available on the Pangaea data base (<https://www.pangaea.de>). For lidar data analysis, GDAS1 (Global Data Assimilation System) height profiles of the National Weather Service's National Centers for Environmental Prediction (NCEP) were used (<https://www.ncdc.noaa.gov/data-access/model-data/model-datasets/global-data-assimilation-system-gdas>).

- 5 Trajectories are calculated with the NOAA (National Oceanic and Atmospheric Administration) HYSPLIT (HYbrid Single-Particle Lagrangian Integrated Trajectory) model (<https://ready.arl.noaa.gov/HYSPLIT.php>). The additionally shown fire data detected by MODIS (Moderate Resolution Imaging Spectroradiometer) are available at: <https://lance.modaps.eosdis.nasa.gov/firemaps>. **BSC-DREAM8b model simulations are operated by the Barcelona Supercomputing Center (<http://www.bsc.es/ess/bsc-dust-daily-forecast/>).** AOT data can be downloaded from the AERONET Maritime Aerosol Network (MAN) data base ([https://aeronet.gsfc.nasa.gov/new\\_web/maritime\\_aerosol\\_](https://aeronet.gsfc.nasa.gov/new_web/maritime_aerosol_network.html)
- 10 [network.html](https://aeronet.gsfc.nasa.gov/new_web/maritime_aerosol_network.html)). The RV Polarstern lidar data are available upon request at TROPOS ([polly@tropos.de](mailto:polly@tropos.de)).

- Acknowledgements.* The authors acknowledge support through ACTRIS under grant agreement No 262254 and ACTRIS-2 under grant agreement No 654109 from the European Union's Horizon 2020 research and innovation programme. **We thank the Alfred Wegener Institute and the RV Polarstern crew for their incredible effort in making those measurements possible (acknowledgement No AWI\_PS95\_00, AWI\_PS98\_00).** Furthermore, we thank the German Weather Service (DWD) for their support during the cruises
- 15 **PS95 and PS98 and appreciate the effort of the AERONET MAN, HYSPLIT and the Barcelona Supercomputing Center teams to provide additional data.**

## References

- Albrecht, B. A.: Aerosols, cloud microphysics, and fractional cloudiness, *Science*, 245, 1227–1230, doi:10.1126/science.245.4923.1227, <http://www.sciencemag.org/cgi/content/abstract/245/4923/1227>, 1989.
- 5 Althausen, D., Engelmann, R., Baars, H., Heese, B., Ansmann, A., Müller, D., and Komppula, M.: Portable Raman lidar Polly<sup>XT</sup> for automated profiling of aerosol backscatter, extinction, and depolarization, *Journal of Atmospheric and Oceanic Technology*, 26, 2366–2378, doi:10.1175/2009JTECHA1304.1, <http://ams.allenpress.com/perlserv/?request=get-abstract&doi=10.1175%2F2009JTECHA1304.1>, 2009.
- Ångström, A.: On the Atmospheric Transmission of Sun Radiation and on Dust in the Air, *Geografiska Annaler*, 11, pp. 156–166, 1929.
- 10 Ansmann, A., Wandinger, U., Riebesell, M., Weitkamp, C., and Michaelis, W.: Independent measurement of extinction and backscatter profiles in cirrus clouds by using a combined Raman elastic-backscatter lidar, *Appl. Opt.*, 31, 7113–7131, doi:10.1364/AO.31.007113, <http://ao.osa.org/abstract.cfm?URI=ao-31-33-7113>, 1992.
- Baars, H., Ansmann, A., Engelmann, R., and Althausen, D.: Continuous monitoring of the boundary-layer top with lidar, *Atmospheric Chemistry and Physics*, 8, 7281–7296, doi:10.5194/acp-8-7281-2008, <http://www.atmos-chem-phys.net/8/7281/2008/>, 2008.
- 15 Baars, H., Kanitz, T., Engelmann, R., Althausen, D., Heese, B., Komppula, M., Preißler, J., Tesche, M., Ansmann, A., Wandinger, U., Lim, J.-H., Ahn, J. Y., Stachlewska, I. S., Amiridis, V., Marinou, E., Seifert, P., Hofer, J., Skupin, A., Schneider, F., Bohlmann, S., Foth, A., Bley, S., Pfüller, A., Giannakaki, E., Lihavainen, H., Viisanen, Y., Hooda, R. K., Pereira, S. N., Bortoli, D., Wagner, F., Mattis, I., Janicka, L., Markowicz, K. M., Achtert, P., Artaxo, P., Pauliquevis, T., Souza, R. A. F., Sharma, V. P., van Zyl, P. G., Beukes, J. P., Sun, J., Rohwer, E. G., Deng, R., Mamouri, R.-E., and Zamorano, F.: An overview of the first decade of Polly<sup>NET</sup>: an emerging network of automated
- 20 Raman-polarization lidars for continuous aerosol profiling, *Atmospheric Chemistry and Physics*, 16, 5111–5137, doi:10.5194/acp-16-5111-2016, <http://www.atmos-chem-phys.net/16/5111/2016/>, 2016.
- Bösenberg, J., Hoff, R., Ansmann, A., Müller, D., Antuña, J. C., Whiteman, D., Sugimoto, N., Apituley, A., Hardesty, M., Welton, J., Eloranta, E., Arshinov, Y., Kinne, S., and Freudenthaler, V.: Plan for the implementation of the GAW Aerosol Lidar Observation Network GALION, GAW No. 178, 2007.
- 25 Burton, S. P., Ferrare, R. A., Hostetler, C. A., Hair, J. W., Rogers, R. R., Obland, M. D., Butler, C. F., Cook, A. L., Harper, D. B., and Froyd, K. D.: Aerosol classification using airborne High Spectral Resolution Lidar measurements – methodology and examples, *Atmospheric Measurement Techniques*, 5, 73–98, doi:10.5194/amt-5-73-2012, <https://www.atmos-meas-tech.net/5/73/2012/>, 2012.
- Eck, T. F., Holben, B. N., Reid, J. S., Dubovik, O., Smirnov, A., O'Neill, N. T., Slutsker, I., and Kinne, S.: Wavelength dependence of the optical depth of biomass burning, urban, and desert dust aerosols, *Journal of Geophysical Research: Atmospheres*, 104, 31 333–31 349, doi:10.1029/1999JD900923, <http://dx.doi.org/10.1029/1999JD900923>, 1999.
- 30 Engelmann, R., Kanitz, T., Baars, H., Heese, B., Althausen, D., Skupin, A., Wandinger, U., Komppula, M., Stachlewska, I. S., Amiridis, V., Marinou, E., Mattis, I., Linné, H., and Ansmann, A.: The automated multiwavelength Raman polarization and water-vapor lidar Polly<sup>XT</sup>: the neXT generation, *Atmospheric Measurement Techniques*, 9, 1767–1784, doi:10.5194/amt-9-1767-2016, <http://www.atmos-meas-tech.net/9/1767/2016/>, 2016.
- 35 Fernald, F. G.: Analysis of atmospheric lidar observations: some comments, *Applied Optics*, 23, 652–653, 1984.
- Groß, S., Tesche, M., Freudenthaler, V., Toledano, C., Wiegner, M., Ansmann, A., Althausen, D., and Seefeldner, M.: Characterization of Saharan dust, marine aerosols and mixtures of biomass-burning aerosols and dust by means of multi-wavelength depolarization and

- Raman lidar measurements during SAMUM 2, *Tellus B*, 63, doi:10.1111/j.1600-0889.2011.00556.x, <http://www.tellusb.net/index.php/tellusb/article/view/16369>, 2011.
- 5 Groß, S., Freudenthaler, V., Wirth, M., and Weinzierl, B.: Towards an aerosol classification scheme for future EarthCARE lidar observations and implications for research needs, *Atmospheric Science Letters*, 16, 77–82, doi:10.1002/asl2.524, <https://rmets.onlinelibrary.wiley.com/doi/abs/10.1002/asl2.524>, 2015.
- Haarig, M., Ansmann, A., Gasteiger, J., Kandler, K., Althausen, D., Baars, H., Radenz, M., and Farrell, D. A.: Dry versus wet marine particle optical properties: RH dependence of depolarization ratio, backscatter, and extinction from multiwavelength lidar measurements during SALTRACE, *Atmospheric Chemistry and Physics*, 17, 14 199–14 217, doi:10.5194/acp-17-14199-2017, <https://www.atmos-chem-phys.net/17/14199/2017/>, 2017.
- 10 IPCC: Climate Change 2013: The Physical Science Basis. Contribution of Working Group I to the Fifth Assessment Report of the Intergovernmental Panel on Climate Change, Cambridge University Press, 589 pp., 2013.
- Kanitz, T., Ansmann, A., Engelmann, R., and Althausen, D.: North-south cross sections of the vertical aerosol distribution over the Atlantic Ocean from multiwavelength Raman/polarization lidar during Polarstern cruises, *Journal of Geophysical Research: Atmospheres*, 118, 2643–2655, doi:10.1002/jgrd.50273, <http://dx.doi.org/10.1002/jgrd.50273>, 2013.
- 15 Kanitz, T., Engelmann, R., Heinold, B., Baars, H., Skupin, A., and Ansmann, A.: Tracking the Saharan Air Layer with shipborne lidar across the tropical Atlantic, *Geophysical Research Letters*, 41, 1044–1050, doi:10.1002/2013GL058780, <http://dx.doi.org/10.1002/2013GL058780>, 2014.
- Klett, J. D.: Stable analytical solution for processing lidar returns, *Applied Optics*, 20, 211–220, 1981.
- 20 Müller, D., Ansmann, A., Mattis, I., Tesche, M., Wandinger, U., Althausen, D., and Pisani, G.: Aerosol–type–dependent lidar ratios observed with Raman lidar, *Journal of Geophysical Research: Atmospheres*, 112, D16 202, doi:10.1029/2006JD008292, <http://www.agu.org/pubs/crossref/2007/2006JD008292.shtml>, 2007.
- Murayama, T., Okamoto, H., Kaneyasu, N., Kamataki, H., and Miura, K.: Application of lidar depolarization measurement in the atmospheric boundary layer: Effects of dust and sea-salt particles, *Journal of Geophysical Research: Atmospheres*, 104, 31 781–31 792, doi:10.1029/1999JD900503, <http://dx.doi.org/10.1029/1999JD900503>, 1999.
- 25 Myhre, G., Samset, B. H., Schulz, M., Balkanski, Y., Bauer, S., Berntsen, T. K., Bian, H., Bellouin, N., Chin, M., Diehl, T., Easter, R. C., Feichter, J., Ghan, S. J., Hauglustaine, D., Iversen, T., Kinne, S., Kirkevåg, A., Lamarque, J.-F., Lin, G., Liu, X., Lund, M. T., Luo, G., Ma, X., van Noije, T., Penner, J. E., Rasch, P. J., Ruiz, A., Seland, Ø., Skeie, R. B., Stier, P., Takemura, T., Tsigaridis, K., Wang, P., Wang, Z., Xu, L., Yu, H., Yu, F., Yoon, J.-H., Zhang, K., Zhang, H., and Zhou, C.: Radiative forcing of the direct aerosol effect from AeroCom Phase II simulations, *Atmospheric Chemistry and Physics*, 13, 1853–1877, doi:10.5194/acp-13-1853-2013, <http://www.atmos-chem-phys.net/13/1853/2013/>, 2013.
- Nisantzi, A., Mamouri, R. E., Ansmann, A., and Hadjimitsis, D.: Injection of mineral dust into the free troposphere during fire events observed with polarization lidar at Limassol, Cyprus, *Atmospheric Chemistry and Physics*, 14, 12 155–12 165, doi:10.5194/acp-14-12155-2014, <http://www.atmos-chem-phys.net/14/12155/2014/>, 2014.
- 35 Ocko, I. B., Ramaswamy, V., Ginoux, P., Ming, Y., and Horowitz, L. W.: Sensitivity of scattering and absorbing aerosol direct radiative forcing to physical climate factors, *Journal of Geophysical Research: Atmospheres*, 117, doi:10.1029/2012JD018019, <http://dx.doi.org/10.1029/2012JD018019>, d20203, 2012.

- Omar, A. H., Winker, D. M., Vaughan, M. A., Hu, Y., Treppe, C. R., Ferrare, R. A., Lee, K.-P., Hostetler, C. A., Kittaka, C., Rogers, R. R., Kuehn, R. E., and Liu, Z.: The CALIPSO Automated Aerosol Classification and Lidar Ratio Selection Algorithm, *Journal of Atmospheric and Oceanic Technology*, 26, 1994–2014, doi:10.1175/2009JTECHA1231.1, <https://doi.org/10.1175/2009JTECHA1231.1>, 2009.
- 5 Pappalardo, G., Amodeo, A., Apituley, A., Comeron, A., Freudenthaler, V., Linné, H., Ansmann, A., Bösenberg, J., D’Amico, G., Mattis, I., Mona, L., Wandinger, U., Amiridis, V., Alados-Arboledas, L., Nicolae, D., and Wiegner, M.: EARLINET: towards an advanced sustainable European aerosol lidar network, *Atmospheric Measurement Techniques*, 7, 2389–2409, doi:10.5194/amt-7-2389-2014, <http://www.atmos-meas-tech.net/7/2389/2014/>, 2014.
- Rittmeister, F., Ansmann, A., Engelmann, R., Skupin, A., Baars, H., Kanitz, T., and Kinne, S.: Profiling of Saharan dust from the Caribbean  
10 to western Africa – Part 1: Layering structures and optical properties from shipborne polarization/Raman lidar observations, *Atmospheric Chemistry and Physics*, 17, 12 963–12 983, doi:10.5194/acp-17-12963-2017, <https://www.atmos-chem-phys.net/17/12963/2017/>, 2017.
- Sakai, T., Shibata, T., Kwon, S.-A., Kim, Y.-S., Tamura, K., and Iwasaka, Y.: Free tropospheric aerosol backscatter, depolarization ratio, and relative humidity measured with the Raman lidar at Nagoya in 1994–1997: contributions of aerosols from the Asian Continent and the Pacific Ocean, *Atmospheric Environment*, 34, 431–442, doi:10.1016/S1352-2310(99)00328-3, <http://www.sciencedirect.com/science/article/pii/S1352231099003283>, 2000.
- 15 Sakai, T., Nagai, T., Zaizen, Y., and Mano, Y.: Backscattering linear depolarization ratio measurements of mineral, sea-salt, and ammonium sulfate particles simulated in a laboratory chamber, *Appl. Opt.*, 49, 4441–4449, doi:10.1364/AO.49.004441, <http://ao.osa.org/abstract.cfm?URI=ao-49-23-4441>, 2010.
- Smirnov, A., Holben, B. N., Sakerin, S. M., Kabanov, D. M., Slutsker, I., Chin, M., Diehl, T. L., Remer, L. A., Kahn, R., Ignatov, A., Liu,  
20 L., Mishchenko, M., Eck, T. F., Kucsera, T. L., Giles, D., and Kopelevich, O. V.: Ship-based aerosol optical depth measurements in the Atlantic Ocean: Comparison with satellite retrievals and GOCART model, *Geophysical Research Letters*, 33, doi:10.1029/2006GL026051, <https://agupubs.onlinelibrary.wiley.com/doi/abs/10.1029/2006GL026051>, 2006.
- Tang, I. N., Tridico, A. C., and Fung, K. H.: Thermodynamic and optical properties of sea salt aerosols, *Journal of Geophysical Research: Atmospheres*, 102, 23 269–23 275, doi:10.1029/97JD01806, <https://agupubs.onlinelibrary.wiley.com/doi/abs/10.1029/97JD01806>, 1997.
- 25 Tesche, M., Ansmann, A., Müller, D., Althausen, D., Engelmann, R., Freudenthaler, V., and Groß, S.: Vertically resolved separation of dust and smoke over Cape Verde using multiwavelength Raman and polarization lidars during Saharan Mineral Dust Experiment 2008, *Journal of Geophysical Research*, 114, D13 202, doi:10.1029/2009JD011862, 2009.
- Tesche, M., Groß, S., Ansmann, A., Müller, D., Althausen, D., Freudenthaler, V., and Esselborn, M.: Profiling of Saharan dust and biomass-burning smoke with multiwavelength polarization Raman lidar at Cape Verde, *Tellus B*, 63, <http://www.tellusb.net/index.php/tellusb/article/view/16360>, 2011a.
- 30 Tesche, M., Müller, D., Groß, S., Ansmann, A., Althausen, D., Freudenthaler, V., Weinzierl, B., Veira, A., and Petzold, A.: Optical and microphysical properties of smoke over Cape Verde inferred from multiwavelength lidar measurements, *Tellus B*, 63, 677–694, doi:10.1111/j.1600-0889.2011.00549.x, <http://dx.doi.org/10.1111/j.1600-0889.2011.00549.x>, 2011b.
- Tsekeri, A., Lopatin, A., Amiridis, V., Marinou, E., Iggloffstein, J., Siomos, N., Solomos, S., Kokkalis, P., Engelmann, R., Baars, H., Gratsea,  
35 M., Raptis, P. I., Biniotoglou, I., Mihalopoulos, N., Kalivitis, N., Kouvarakis, G., Bartsotas, N., Kallos, G., Basart, S., Schuetttemeyer, D., Wandinger, U., Ansmann, A., Chaikovsky, A. P., and Dubovik, O.: GARRLiC and LIRIC: strengths and limitations for the characterization of dust and marine particles along with their mixtures, *Atmospheric Measurement Techniques*, 10, 4995–5016, doi:10.5194/amt-10-4995-2017, <https://www.atmos-meas-tech.net/10/4995/2017/>, 2017.
- Twomey, S.: The Influence of Pollution on the Shortwave Albedo of Clouds, *Journal of Atmospheric Science*, 34, 1149–1154, 1977.

- Veselovskii, I., Goloub, P., Podvin, T., Bovchaliuk, V., Derimian, Y., Augustin, P., Fourmentin, M., Tanre, D., Korenskiy, M., Whiteman, D. N., Diallo, A., Ndiaye, T., Kolgotin, A., and Dubovik, O.: Retrieval of optical and physical properties of African dust from multi-wavelength Raman lidar measurements during the SHADOW campaign in Senegal, *Atmospheric Chemistry and Physics*, 16, 7013–7028, doi:10.5194/acp-16-7013-2016, <http://www.atmos-chem-phys.net/16/7013/2016/>, 2016.
- 5
- Wandinger, U.: Introduction to Lidar, in: *Lidar: Range-Resolved Optical Remote Sensing of the Atmosphere*, edited by Weitkamp, C., pp. 1–18, Springer, 2005.
- Zieger, P., Väisänen, O., Corbin, J. C., Partridge, D. G., Bastelberger, S., Mousavi-Fard, M., Rosati, B., Gysel, M., Krieger, U. K., Leck, C., Nenes, A., Riipinen, I., Virtanen, A., and Salter, M. E.: Revising the hygroscopicity of inorganic sea salt particles, *Nature Communications*, 8, doi:10.1038/ncomms15883, 2017.

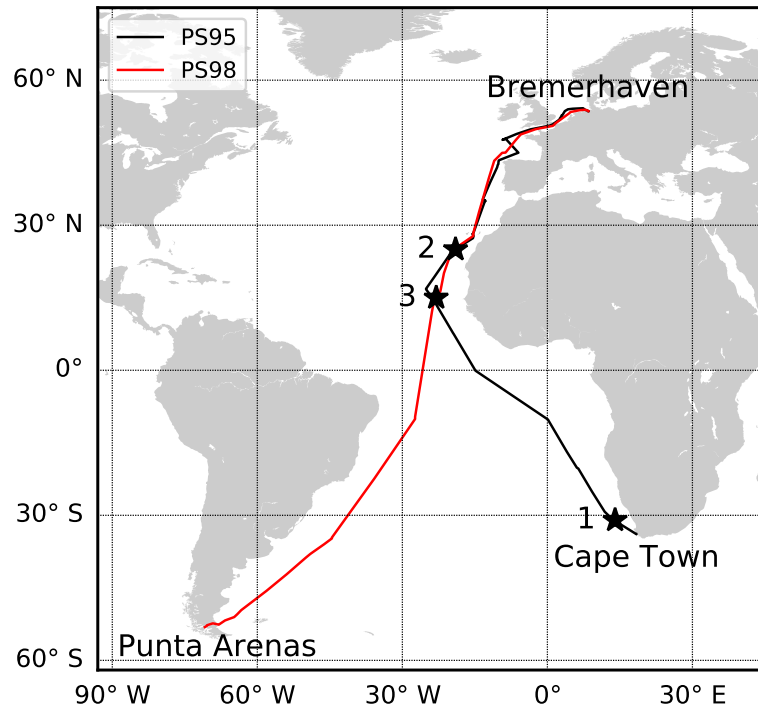

**Figure 1.** RV Polarstern cruises with Polly<sup>XT</sup> aboard. Cruise tracks are taken from the Pangaea database (<https://www.pangaea.de/expeditions/cr.php/Polarstern>, accessed: 24/02/2017). Black stars mark the location of the case studies presented in Sec.3.2.

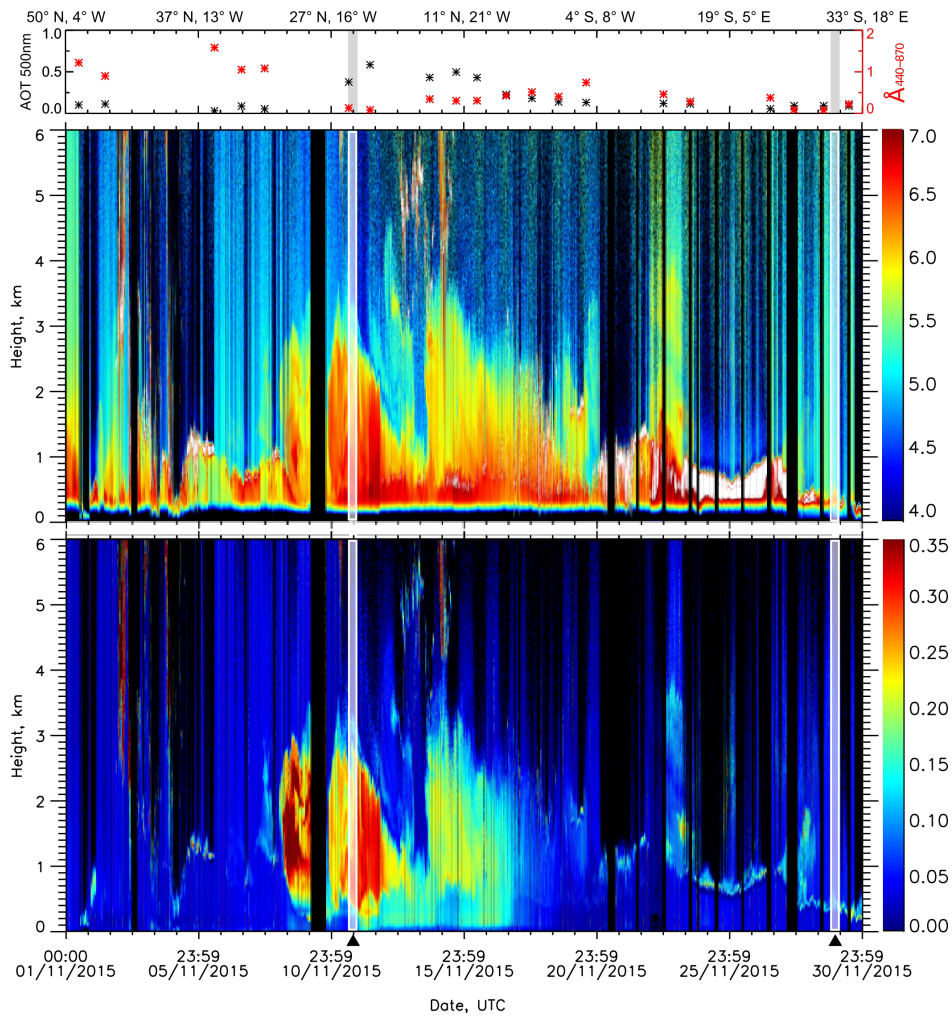

**Figure 2.** Observational overview of the autumn cruise PS95 from Bremerhaven to Cape Town. Time series of the 500 nm **daily mean** AOT and **daily mean** 440-870 nm Ångström exponent derived with Microtops sun photometer measurements (upper panel) and height-time display of the 1064 nm range-corrected lidar signal (middle panel) and the volume depolarisation ratio at 532 nm (lower panel). **White bars mark the case studies discussed in Sec.3.2.**



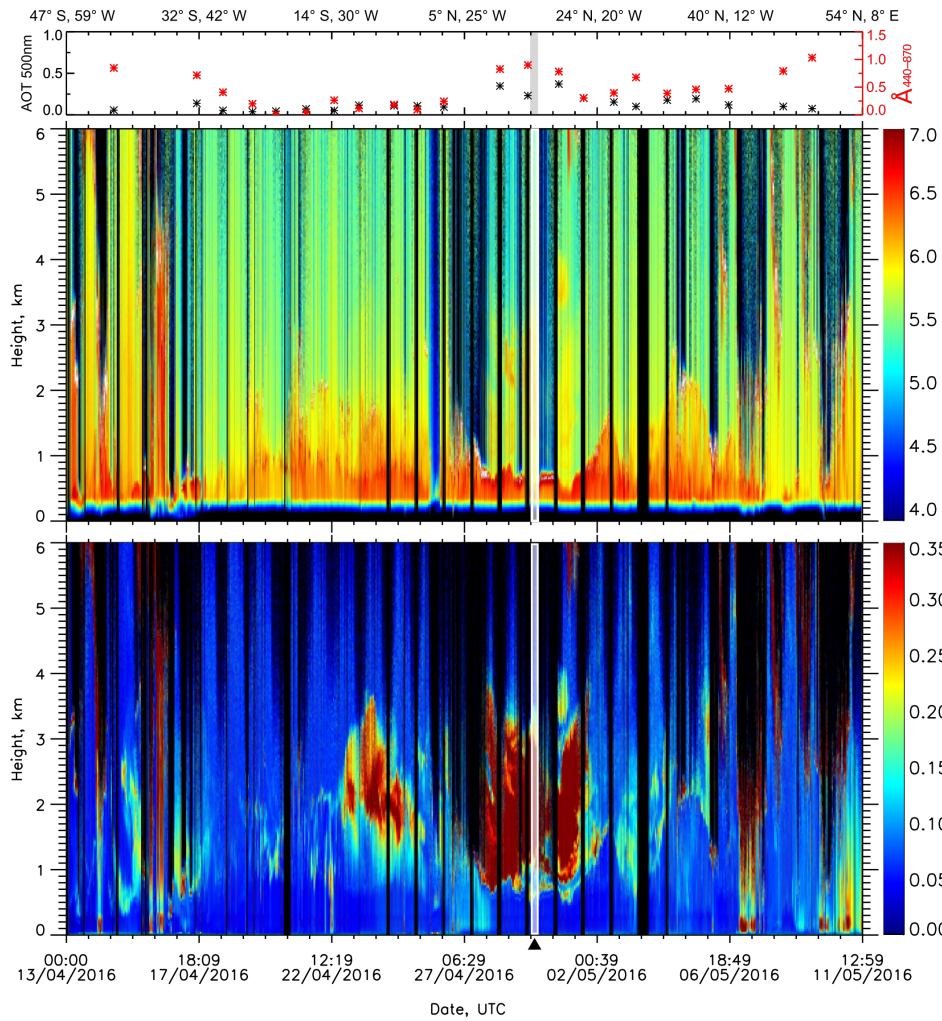

**Figure 3.** Same as Fig. 2 but for the spring cruise PS98 from Punta Arenas to Bremerhaven. Due to the failure of the 1064 nm channel, the 532 nm range-corrected signal is shown in the middle panel. **The white bar indicates the in Sec.3.2.3 discussed case study.**

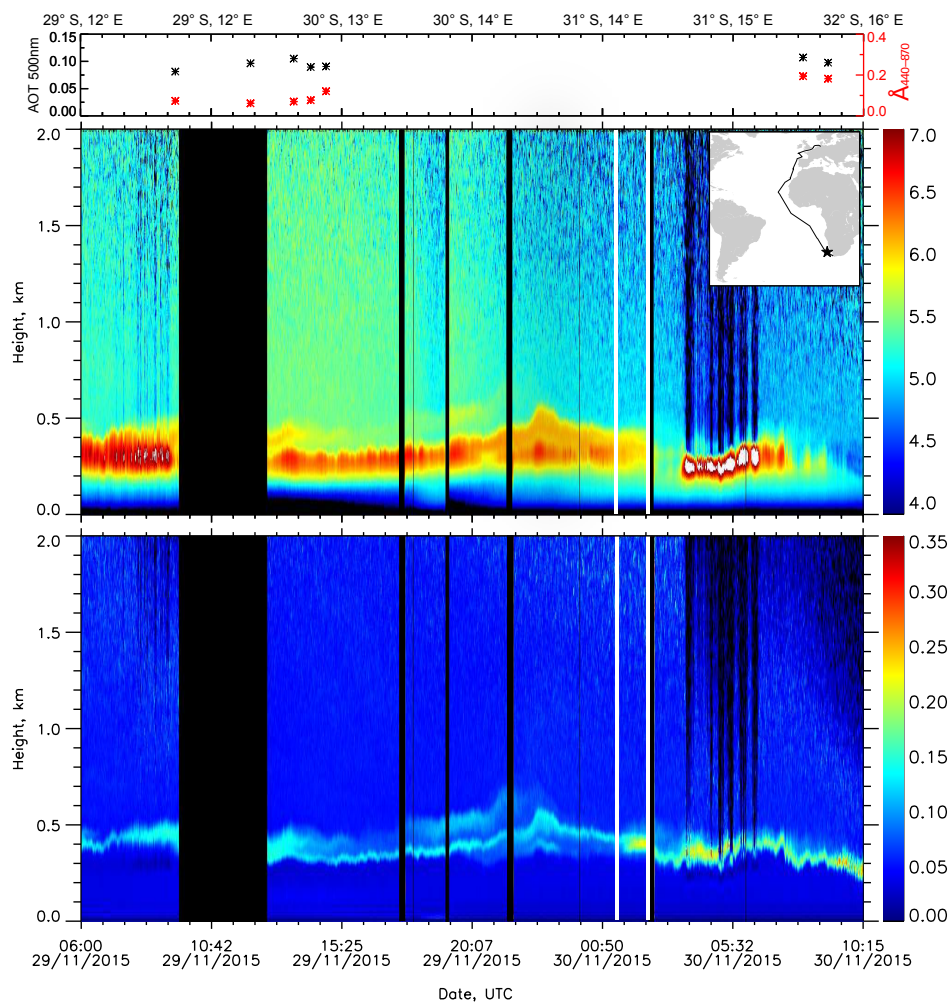

**Figure 4.** Marine conditions during PS95: time series of the Microtops sun photometer derived AOT at 500 nm and 440/870 nm Ångström exponent (upper panel), 1064 nm range-corrected signal (middle panel) and 532 nm volume depolarisation ratio (lower panel). **Vertical white lines indicate the signal-averaging period for profiles shown in Fig. 5. The black star in the cruise map shows the location of RV Polarstern during this period.**

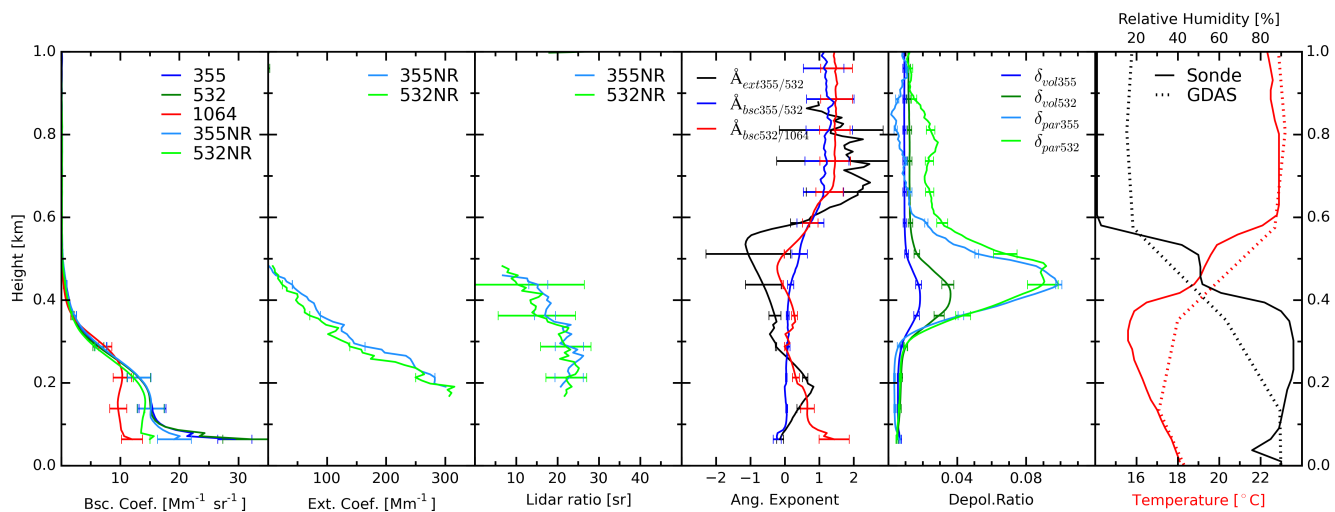

**Figure 5.** Profiles averaged for 30 November 2015, 01:15–02:30 UTC. Backscatter coefficient and depolarisation ratios smoothed with 127.5 m vertical length. Extinction coefficients, lidar ratios and Ångström exponents are smoothed with 127.5 m up to 242 m and afterwards with 367.5 m. Meteorological data from GDAS1 (30 November 2015, 00 UTC) and radio sounding measurements (29 November 2015, 12 UTC) are also presented.

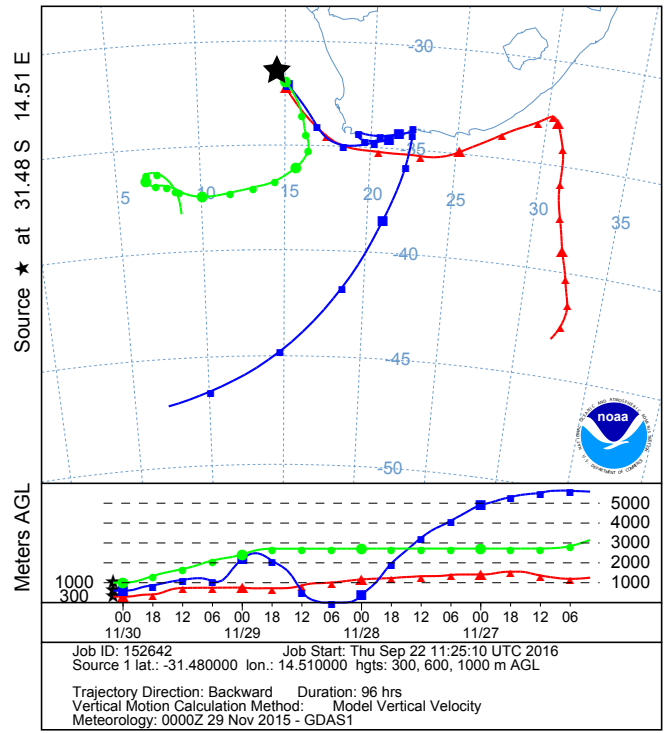

**Figure 6.** NOAA HYSPLIT backward trajectories for 4 days ending at the position of **RV Polarstern** (31.48° S, 14.51° E, marked by the black star) on 30 November 2015, 02:00 UTC at 300 m, 600 m and 1000 m AGL.

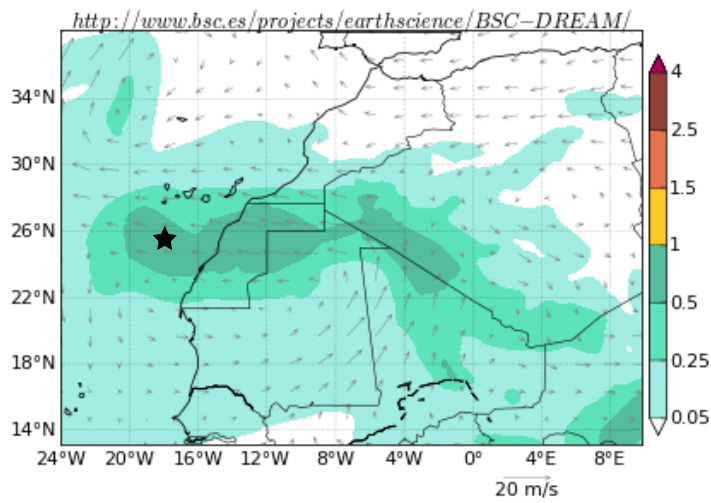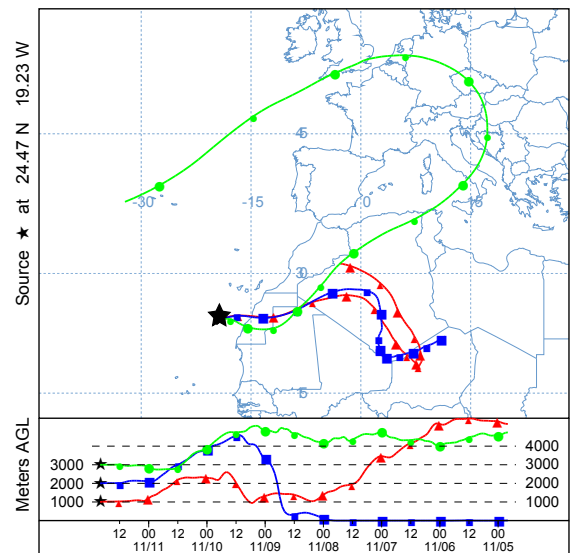

**Figure 7.** Left: Column integrated dust concentration ( $\text{g m}^{-2}$ ) and 3000m wind on 11 November 2015 12:00 UTC from the BSC-DREAM8b model (Dust REgional Atmospheric Model), operated by the Barcelona Supercomputing Center (<http://www.bsc.es/ess/bsc-dust-daily-forecast>, accessed: 14/11/2016). Right: 7-day NOAA HYSPLIT backward trajectories ending at the position of **RV** Polarstern on 11 November 2015, 20:00 UTC (24.27° N, 19.23° W). The position of **RV** Polarstern is marked by the black star.

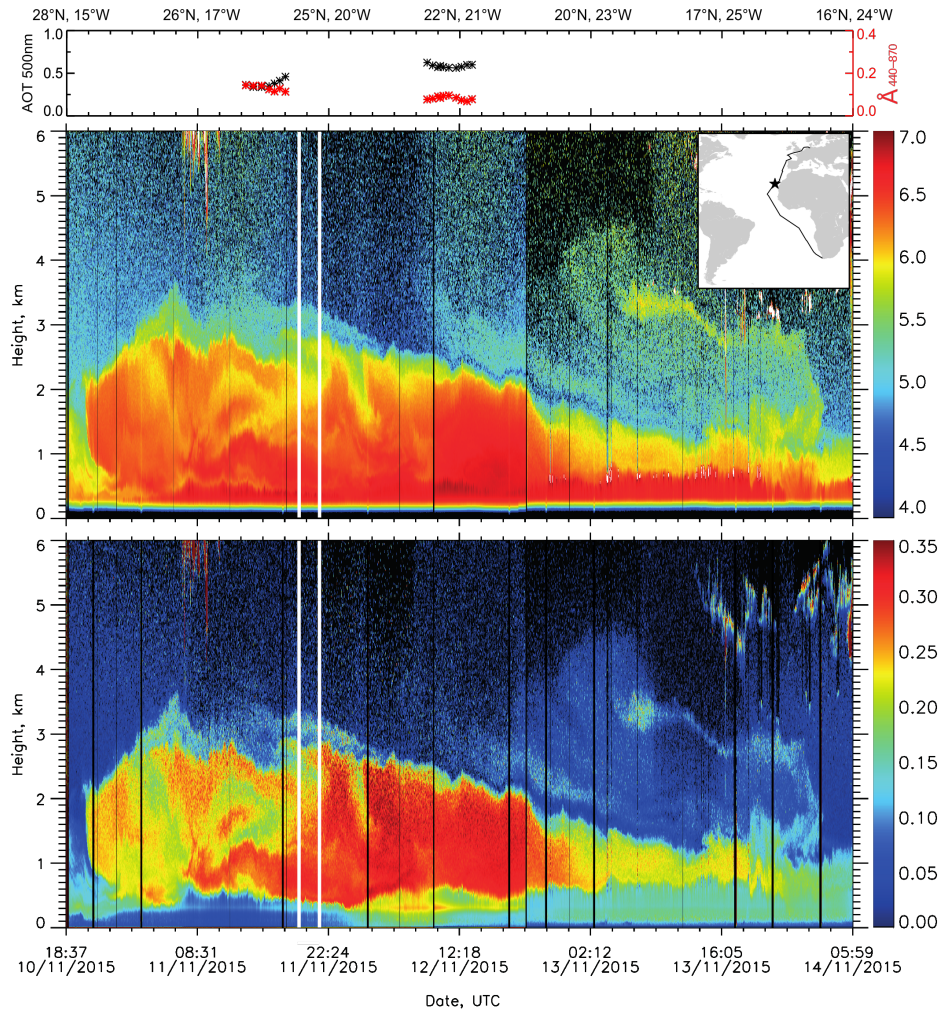

**Figure 8.** First dust event observed during PS95: time series of the Microtops sun photometer derived AOT (500 nm) and 440/870 nm Ångström exponent (upper panel), 1064 nm range-corrected signal (middle panel) and 532 nm volume depolarisation ratio (lower panel). Vertical white lines indicate the signal-averaging period for profiles shown in Fig.9. The black star in the cruise map shows the location of RV Polarstern during this period.

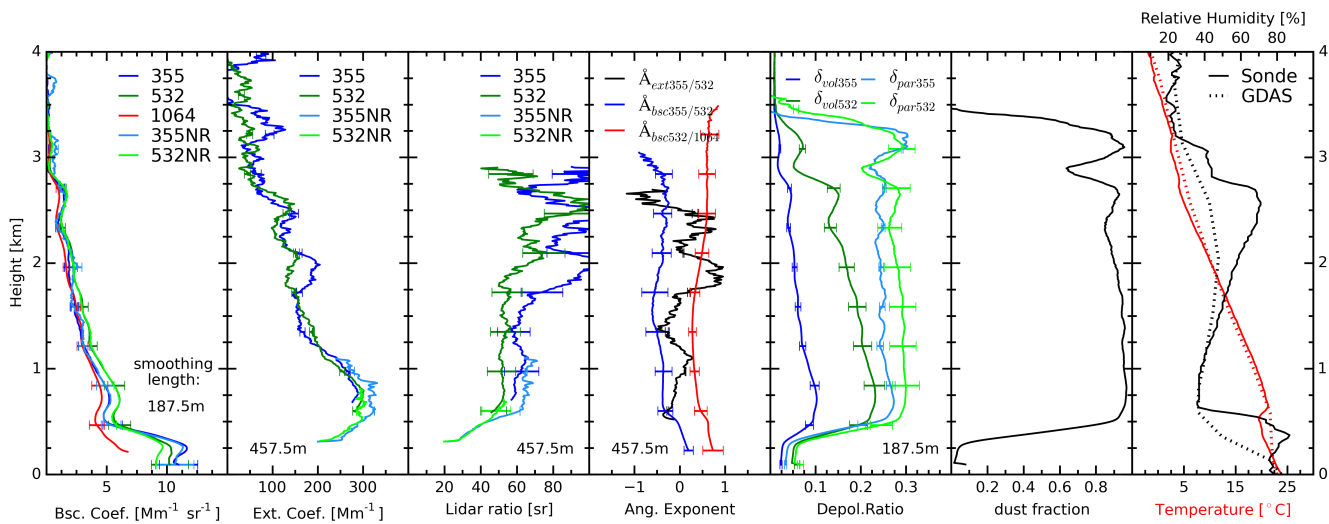

**Figure 9.** Profiles averaged for 11 November 2015, 19:30–21:00 UTC. Dust fraction calculated after Tesche et al. (2009). Radio sounding profiles from 11 November 2015, 12 UTC and GDAS1 profiles (11 November 2015, 18 UTC) are presented in the right panel.

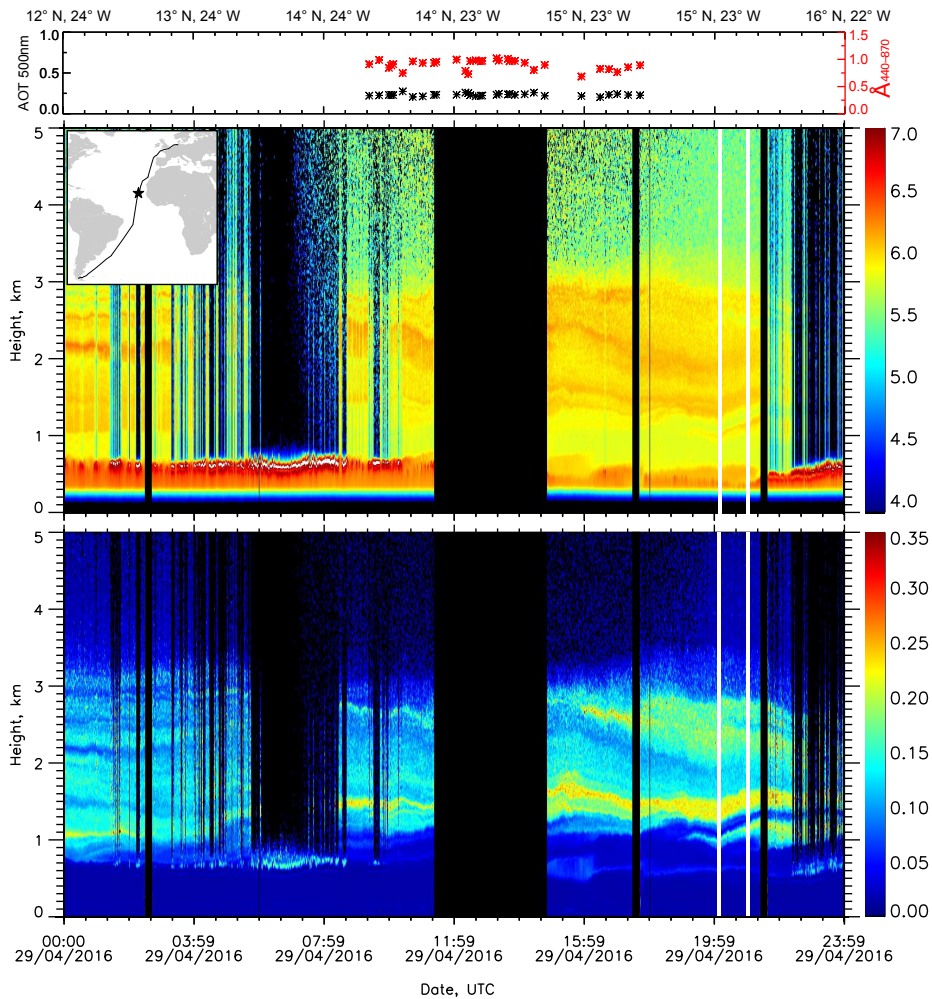

**Figure 10.** Complex aerosol layering with smoke and dust on PS98: Sun photometer derived AOT at 500 nm and 440/870 nm Ångström exponent (upper panel), 532 nm range-corrected signal (middle panel) and volume depolarisation ratio (lower panel). **Vertical white lines** indicate the signal-averaging period for profiles shown in Fig. 11. The black star in the cruise map shows the location of RV Polarstern during this period.



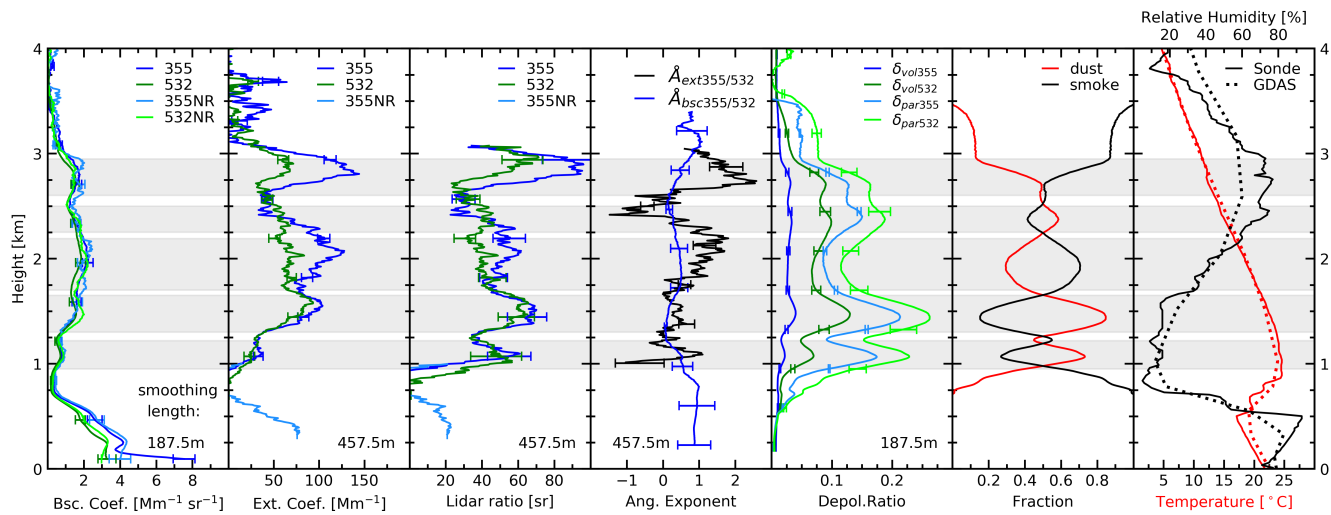

**Figure 11.** Averaged profiles for 29 April 2016, 20:15–21:00 UTC. Dust and smoke fractions calculated after Tesche et al. (2009). Meteorological data from GDAS1 (29 April 2016, 21 UTC) and radio sounding measurements (29 April 2016, 15 UTC). Layers are marked grey.

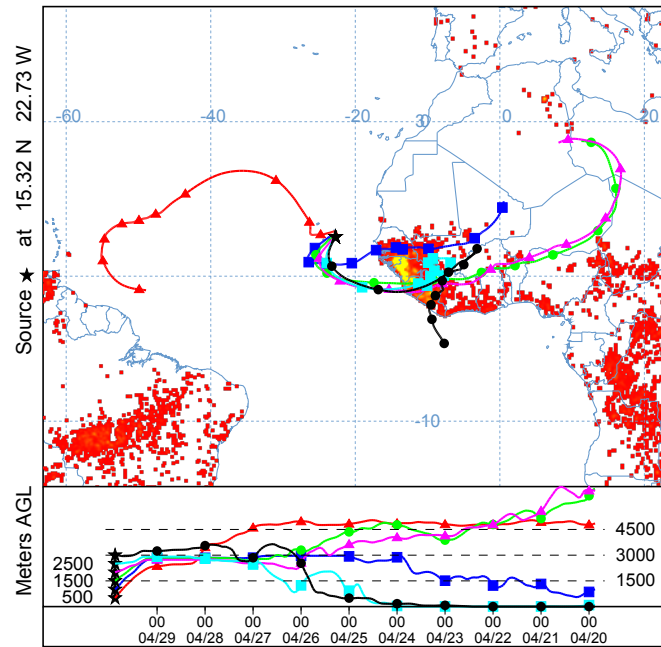

**Figure 12.** NOAA HYSPLIT backward trajectories ending at 29 April 2016 21:00 UTC at the position of **RV Polarstern** (15.32° N, 22.73° W, marked by the black star) at different altitudes. Additionally, fires detected by MODIS on board the Terra and Aqua satellites are shown. Fires are accumulated over the 10-day period from 20 April 2016 to 29 April 2016. Yellow color indicates a large number of fires, red dots indicate a low number of fires in the considered period (<https://lance.modaps.eosdis.nasa.gov/firemaps>, accessed: 24/02/2017).

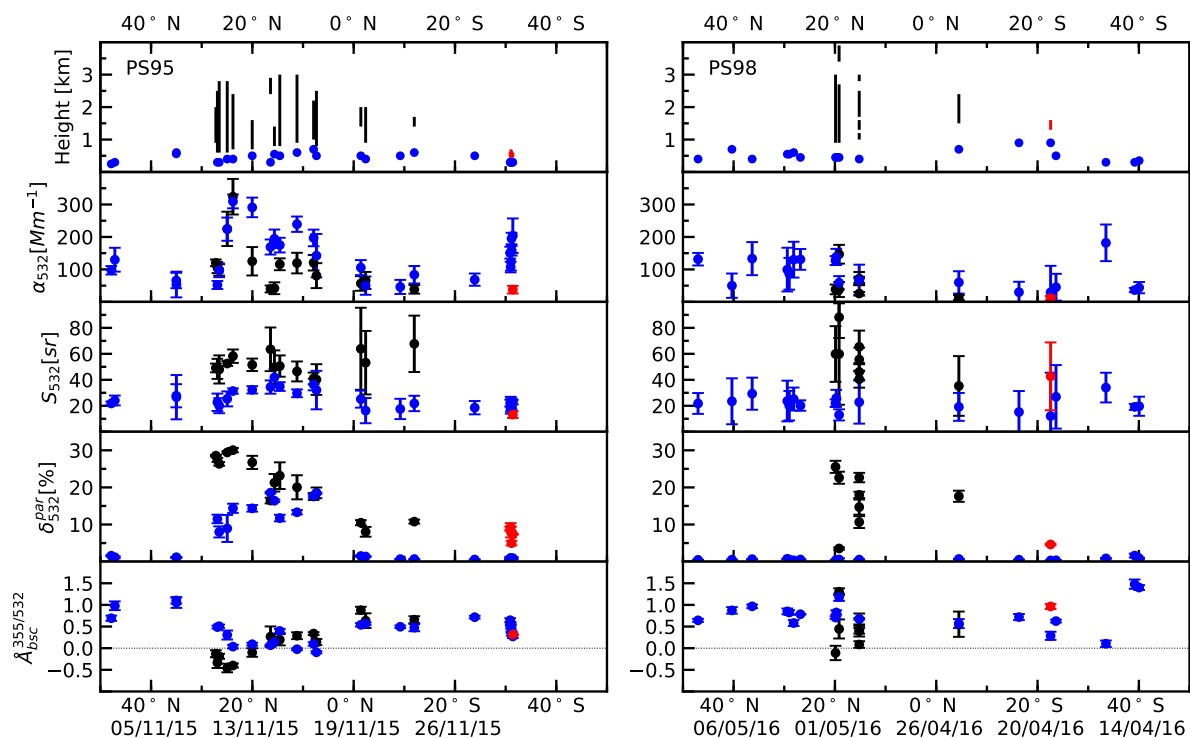

**Figure 13.** Mean values of extinction coefficient, lidar ratio and particle depolarisation ratio at 532 nm and the backscatter-related Ångström exponent at 355/532 nm (top down) for MBL (blue), elevated aerosol layers (black) and dried marine layers (red) on PS95 (left column) and PS98 (right column) from North to South. Error bars indicate the standard deviation. MBL top height and extent of the elevated layers are shown in the first row.

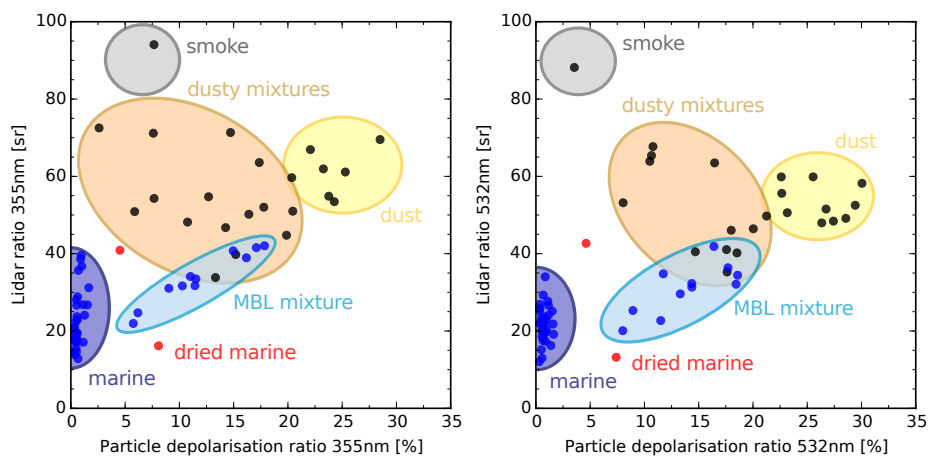

**Figure 14.** Lidar ratio as a function of the particle depolarisation ratio at 355 nm (left) and at 532 nm (right) from all analysed MBL (blue), elevated aerosol layer (black) and dried marine layer (red) measurements of PS95 and PS98. **Coloured ellipses denote the different aerosol categories.**

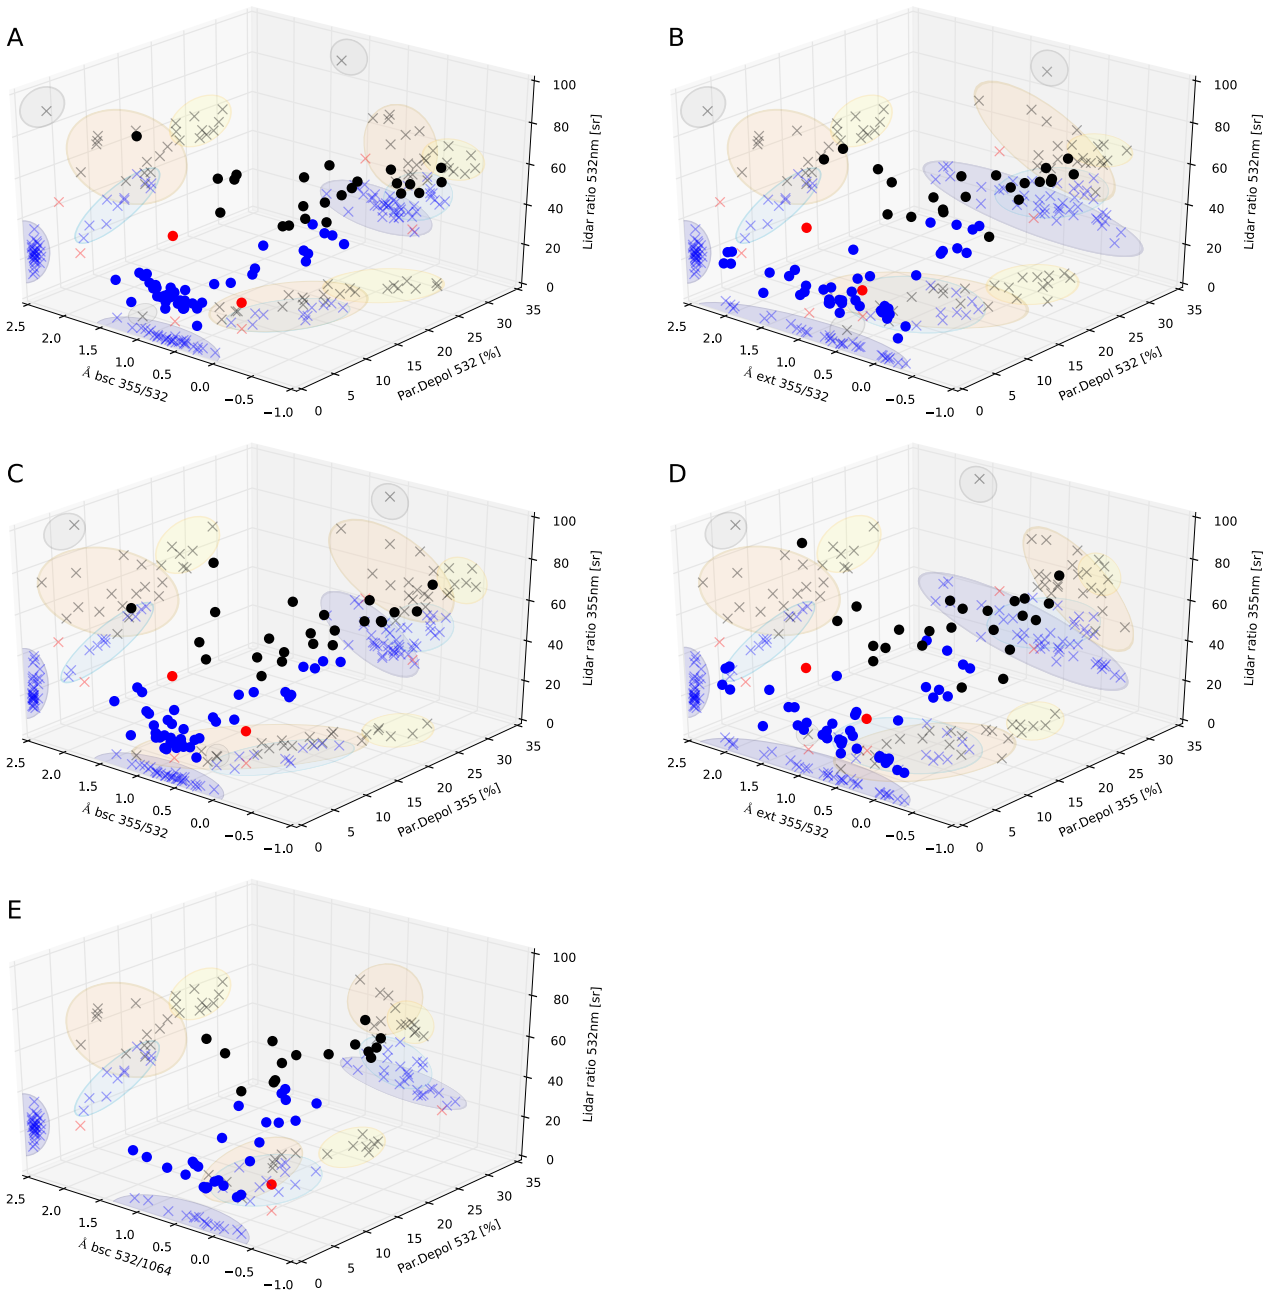

**Figure 15.** Three-dimensional illustration of the relation between lidar ratio and depolarisation ratio at 355 nm and 532 nm and backscatter and extinction-related Ångström exponent at 355/532 nm and backscatter-related Ångström exponent at 532/1064 nm. Blue dots represent MBL measurements, black dots elevated aerosol layers and red dots dried marine layers.
